# Supplementary material
Source: PubMed Central journal article supplement (PMC5777264)

## Supplemental Information:

# A novel chemical inducer of *Streptococcus* quorum sensing acts by inhibiting the pheromone-degrading endopeptidase PepO

Tiara G. Pérez Morales<sup>\*1</sup>, Kiira Ratia<sup>2</sup>, Duo-Sheng Wang<sup>3</sup>, Artemis Gogos<sup>4</sup>, Tom G. Driver<sup>3,5</sup>, and Michael J. Federle<sup>1,4</sup>

<sup>1</sup> Center for Biomolecular Sciences, Department of Medicinal Chemistry and Pharmacognosy

<sup>2</sup> UIC High-throughput Screening Core Facility

<sup>3</sup> Department of Chemistry, University of Illinois at Chicago

<sup>4</sup> Department of Microbiology and Immunology, University of Illinois at Chicago

<sup>5</sup> Institute of Next Generation Matter Transformation, College of Chemical Engineering, Huaqiao University, 668 Jimei Boulevard, Xiamen, Fujian 361021, People's Republic of China

### Supporting Information

#### Contents:

|      |                                       |     |
|------|---------------------------------------|-----|
| I.   | Preparation of P516-0475 Analogs..... | s-2 |
| II.  | Supplementary Figure 1a, 1b .....     | s-6 |
| III. | Supplementary Figure 2a, 2b.....      | s-7 |
| IV.  | Spectral Data.....                    | s-8 |

**General.** <sup>1</sup>H NMR and <sup>13</sup>C NMR spectra were recorded at ambient temperature using 500 MHz or 300 MHz spectrometers. The data are reported as follows: chemical shift in ppm from internal tetramethylsilane on the  $\delta$  scale, multiplicity (br = broad, s = singlet, d = doublet, t = triplet, q = quartet, m = multiplet), coupling constants (Hz) and integration. High-resolution mass spectra were obtained by peak matching. Melting points are reported uncorrected. Infrared spectroscopy was obtained using a diamond attenuated total reflectance (ATR) accessory. Analytical thin layer chromatography was performed on 0.25 mm extra hard silica gel plates with UV254 fluorescent indicator. Liquid chromatography was performed using forced flow (flash chromatography) of the indicated solvent system on 60Å (40 – 60  $\mu$ m) mesh silica gel (SiO<sub>2</sub>). Medium pressure liquid chromatography (MPLC) was performed to force flow the indicated solvent system down columns that had been packed with 60Å (40 – 60  $\mu$ m) mesh silica gel (SiO<sub>2</sub>). All reactions were carried out under an atmosphere of nitrogen in glassware, which had been oven-dried. Unless otherwise noted, all reagents were commercially obtained and, where appropriate, purified prior to use. Acetonitrile, Methanol, Toluene, THF, Et<sub>2</sub>O, and CH<sub>2</sub>Cl<sub>2</sub> were dried by filtration through alumina according to the procedure of Grubbs.<sup>1</sup> Metal salts were stored in a nitrogen atmosphere dry box.

## I. Preparation of P516-0475 Analogs.

The P516-0475 analogs were prepared by the synthesis in Scheme s1.

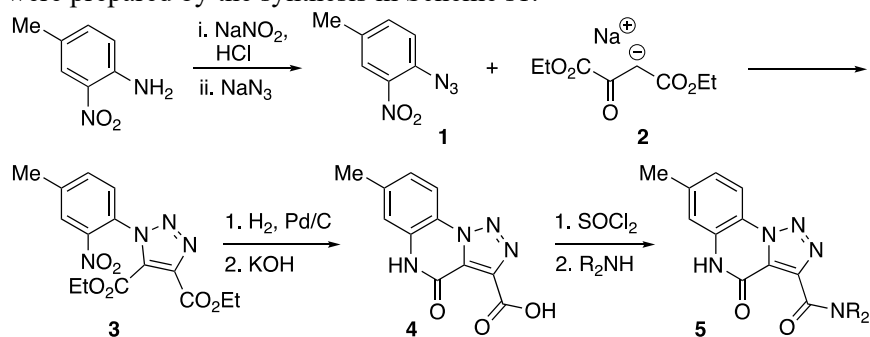

Scheme s1. Synthesis of P516-0475 analogs

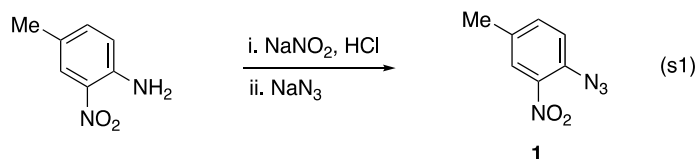

**4-Azido-2-nitrotoluene 1.**<sup>2</sup> To a cooled (0 °C) solution of 6.09 g of 2-nitro-4-toluidine (40.2 mmol) in 160 mL of water was added 90 mL of a 37% w/w aq soln of HCl followed by the dropwise addition of 20 mL of an aq soln of sodium nitrite (2.99 g, 42.0 mmol). After 10 min, 2.60 g of sodium azide (40.0 mmol) was added in portions. After 1 h, the ice bath was removed, and the reaction mixture was allowed to warm to room temperature. After 1 h, the resulting solution was extracted with 3 × 40 mL of dichloromethane. The combined organic phases were washed with H<sub>2</sub>O and brine. The resulting organic phase was dried over Na<sub>2</sub>SO<sub>4</sub>, filtered, and the filtrate was concentrated *in vacuo* to form the aryl azide, which matched the characterization data reported by Vijayakumar and co-workers.<sup>2</sup>

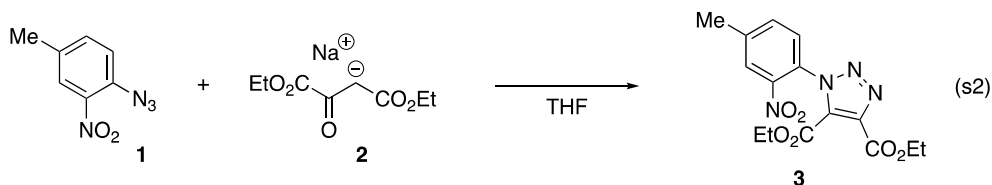

**1-(4-Methyl-2-nitrophenyl)-4,5-diethylester 1H-1,2,3-triazole-4,5-dicarboxylic acid 3.**<sup>3</sup> To a warmed (35 °C) suspension of diethyl oxalacetate sodium salt 2 (4.73 g, 22.5 mmol) in 60 mL of THF was added dropwise a solution of 4-azido-2-nitrotoluene 1 (2.67 g, 15.0 mmol) in 50 mL of THF. After addition the reaction mixture was heated to 50 °C. After 7 h, the reaction mixture was cooled to room temperature and then concentrated *in vacuo*. The residue was diluted with 25 mL of H<sub>2</sub>O, and the resulting mixture was extracted with 3 × 20 mL of dichloromethane. The combined organic phases were dried over Na<sub>2</sub>SO<sub>4</sub>, filtered and the filtrate was concentrated *in vacuo*. Purification by MPLC (1:2 EtOAc:hexanes) afforded the product (5.22 g, quant).<sup>3</sup>

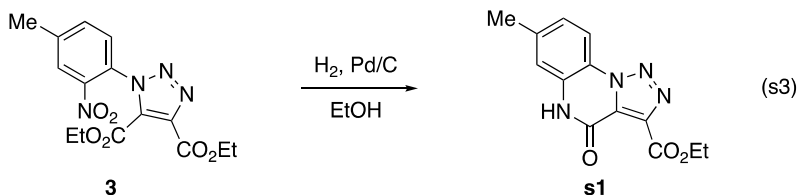

**4,5-Dihydro-7-methyl-4-oxo-ethyl ester [1,2,3]-triazole[1,5-*a*]quinoxaline-3-carboxylic acid **s1**.**<sup>3</sup> To a solution of triazole **3** (5.00 g, 14.3 mmol) in 300 mL of EtOH was added 0.430 g of Pd/C (10 wt % of Pd) and a balloon of H<sub>2</sub> was attached. When adsorption of the hydrogen volume was completed (approximately 15 h as monitored using thin layer chromatography), the reaction mixture was filtered. The precipitate was washed with 3 × 20 mL of hot dichloromethane. The dichloromethane washings were concentrated *in vacuo* to afford the product (4.98 g, quant).<sup>3</sup>

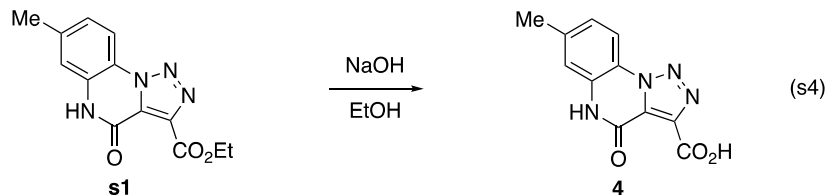

**4,5-Dihydro-7-methyl-4-[1,2,3]-triazole[1,5-*a*]quinoxaline-3-carboxylic acid **4**.**<sup>4</sup> To a solution of ethyl ester **s1** (4.80 g, 13.8 mmol) in 20 mL of EtOH was added 20 mL of a 10 wt % aq soln of NaOH. The resulting mixture was heated to reflux. After 4 h, the reaction mixture was cooled to room temperature and then concentrated *in vacuo*. The resulting residue was diluted with H<sub>2</sub>O and acidified to a pH 2 to precipitate the acid, which were collected by filtration and washed with water to produce the product (3.75 g, quant).<sup>4</sup>

### 1. General procedure for amide formation

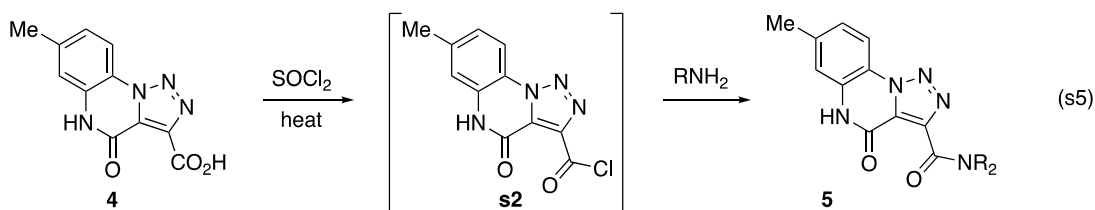

A solution of acid **4** (0.2 mmol) in 2 mL of SOCl<sub>2</sub> was heated to reflux. After 1 h, the reaction mixture was cooled to room temperature and then concentrated *in vacuo* to produce the acid chloride **s2** as a thick viscous oil, which was dissolved in 5 mL of toluene. To the resulting solution was added dropwise a solution of the amine (0.3 mmol) and 1.0 mL of triethylamine (7.0 mmol) in 2 mL of toluene. The resulting mixture was heated to reflux. After 20 h, the reaction mixture was cooled to room temperature. The resulting precipitation was isolated by filtration and was washed with toluene and water. The resulting solid was dissolved in hot EtOH and water and filtered to produce the amide product.

### 2. Characterization data for P516-0475 analogs.

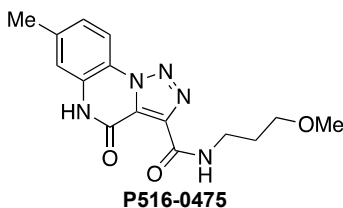

**4,5-Dihydro-*N*-(3-methoxypropyl)-7-methyl-4-oxo-[1,2,3]-triazole[1,5-*a*]quinoxaline-3-carboxamide P516-0475.** The general procedure was followed using 0.2 mmol of acid **4**, 2 mL of SOCl<sub>2</sub>, 3-methoxypropylamine (0.3 mmol), 1.0 mL of triethylamine in 7 mL of toluene to afford the product as a yellow amorphous solid: <sup>1</sup>H NMR (500 MHz, DMSO-*d*<sub>6</sub>) δ 12.57 (br s, 1H) 10.08 (s, 1H), 8.22 (d, *J* = 8.0 Hz, 1H), 7.23 (s, 2H), 3.41 (t, *J* = 6.7 Hz, 2H), 3.32 (s, 2H), 3.24 (s, 3H), 2.39, (s, 3H), 1.77 (m, 2H); <sup>13</sup>C NMR (125 MHz, DMSO-*d*<sub>6</sub>) δ 158.4, 155.8, 141.3, 140.3, 129.2, 125.9, 125.1, 119.5, 117.2, 116.2, 69.8, 58.4, 36.3, 29.5, 21.5.

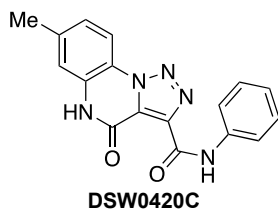

**4,5-Dihydro-7-methyl-4-oxo-N-phenyl-[1,2,3]-triazole[1,5-a]quinoxaline-3-carboxamide DSW0420C.** The general procedure was followed using 0.2 mmol of acid **4**, 2 mL of SOCl<sub>2</sub>, aniline (0.3 mmol), 1.0 mL of triethylamine in 7 mL of toluene to afford the product as a white solid: <sup>1</sup>H NMR (500 MHz, DMSO-*d*<sub>6</sub>) δ 12.80 (br s, 1H), 12.34 (s, 1H), 8.31 (d, *J* = 8.5 Hz, 1H), 7.73 (d, *J* = 8.0 Hz, 2H), 7.41 (t, *J* = 7.5 Hz, 2H), 7.31 (d, *J* = 8.0 Hz, 2H), 7.15 (t, *J* = 7.5 Hz, 1H), 2.48 (s, 3H); <sup>13</sup>C NMR (125 MHz, DMSO-*d*<sub>6</sub>) δ 156.5, 156.3, 141.4, 140.6, 138.9, 129.7, 129.1, 126.2, 125.3, 124.6, 119.8, 119.6, 117.4, 116.4, 21.5.

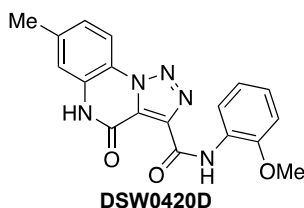

**4,5-Dihydro-7-methyl-4-oxo-N-(2-methoxyphenyl)-[1,2,3]-triazole[1,5-a]quinoxaline-3-carboxamide DSW0420D.** The general procedure was followed using 0.2 mmol of acid **4**, 2 mL of SOCl<sub>2</sub>, 2-methoxyaniline (0.3 mmol), 1.0 mL of triethylamine in 7 mL of toluene to afford the product as a white solid: <sup>1</sup>H NMR (500 MHz, DMSO-*d*<sub>6</sub>) δ 12.77 (br s, 1H), 12.04 (s, 1H), 8.37 (d, *J* = 8.0 Hz, 1H), 8.29 (d, *J* = 8.0 Hz, 1H), 7.28 (m, 2H), 7.12 (m, 2H), 6.98 (t, *J* = 6.5 Hz, 1H) 3.88 (s, 3H), 2.43 (s, 3H); <sup>13</sup>C NMR (125 MHz, DMSO-*d*<sub>6</sub>) δ 156.6, 156.0, 149.9, 141.1, 140.4, 134.1, 129.3, 128.0, 125.9, 121.7, 120.9, 119.6, 117.2, 116.4, 114.8, 111.9, 56.3, 21.5.

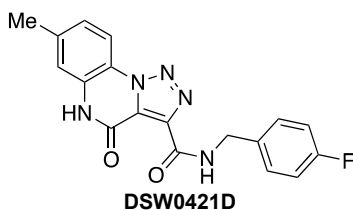

**4,5-Dihydro-7-methyl-4-oxo-N-(4-fluorophenyl)methyl-[1,2,3]-triazole[1,5-a]quinoxaline-3-carboxamide DSW0421D.** The general procedure was followed using 0.2 mmol of acid **4**, 2 mL of SOCl<sub>2</sub>, 4-fluorobenzylamine (0.3 mmol), 1.0 mL of triethylamine in 7 mL of toluene to afford the product as a white solid: <sup>1</sup>H NMR (500 MHz, DMSO-*d*<sub>6</sub>) δ 12.58 (br s, 1H), 10.50 (s, 1H), 8.27 (m, 1H), 7.42 (t, *J* = 8.0 Hz, 2H), 7.27 (t, *J* = 8.0 Hz, 2H), 7.16 (s, 2H), 4.58 (s, 2H), 2.42 (s, 3H); <sup>13</sup>C NMR (125 MHz, DMSO-*d*<sub>6</sub>) δ 161.8 (d, *J*<sub>CF</sub> = 240.9 Hz), 158.5, 155.8, 140.7 (d, *J*<sub>CF</sub> = 89.9 Hz), 135.4, 129.9, 129.8, 129.1, 126.0, 125.3, 119.5, 117.2, 116.3, 115.6 (d, *J*<sub>CF</sub> = 21.1 Hz), 42.2, 21.5.

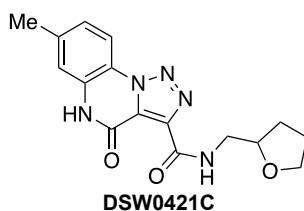

**4,5-Dihydro-7-methyl-4-oxo-N-[(tetrahydro-2-furanyl)methyl]-[1,2,3]-triazole[1,5-a]quinoxaline-3-carboxamide DSW0421C.** The general procedure was followed using 0.2 mmol of acid **4**, 2 mL of SOCl<sub>2</sub>, (tetrahydro-2-furanyl)methylamine (0.3 mmol), 1.0 mL of triethylamine in 7 mL of toluene to afford the product as a white solid: <sup>1</sup>H

NMR (500 MHz, DMSO-*d*<sub>6</sub>) δ 12.57 (br s, 1H), 10.19 (br s, 1H), 8.24 (m, 1H), 7.25 (br s, 2H), 3.98 (br s, 1H), 3.80 (br s, 1H), 3.63 (br s, 1H), 3.46 (br s, 2H), 2.48 (s, 3H), 1.81 – 1.94 (m, 3H), 1.59 (br s, 1H); <sup>13</sup>C NMR (125 MHz, DMSO-*d*<sub>6</sub>) δ 158.5, 155.9, 141.1, 140.4, 129.1, 125.9, 125.1, 119.5, 117.2, 116.3, 77.4, 67.9, 43.2, 28.9, 25.8, 21.5.

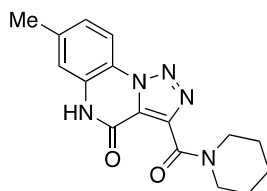

**DSW0421E**

**3-(1-Piperidinylcarbonyl)-[1,2,3]-triazole[1,5-*a*]quinoxalin-4(5H)-one DSW0421E.** The general procedure was followed using 0.2 mmol of acid **4**, 2 mL of SOCl<sub>2</sub>, piperidine (0.3 mmol), 1.0 mL of triethylamine in 7 mL of toluene to afford the product as a white solid: <sup>1</sup>H NMR (500 MHz, DMSO-*d*<sub>6</sub>) δ 12.06 (br s, 1H), 8.16 (br s, 1H), 7.19 (br s, 2H), 3.64 (br s, 2H), 3.32 (br s, 3H), 3.21 (br s, 2H), 2.38 (br s, 3H), 1.58 (br s, 4H), 1.41 (2H); δ 12.58 (br s, 1H), 10.50 (s, 1H), 8.27 (m, 1H), 7.42 (t, *J* = 8.0 Hz, 2H), 7.27 (t, *J* = 8.0 Hz, 2H), 7.16 (s, 2H), 4.58 (s, 2H), 2.32 (s, 3H); <sup>13</sup>C NMR (125 MHz, DMSO-*d*<sub>6</sub>) δ 159.9, 153.6, 141.6, 140.0, 129.8, 125.1, 124.3, 119.4, 117.1, 116.1, 47.8, 42.6, 26.3, 25.7, 24.4, 21.5.

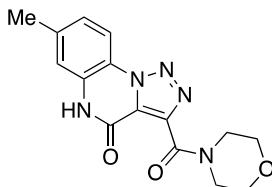

**DSW0421F**

**3-(4-Morpholinylcarbonyl)-[1,2,3]-triazole[1,5-*a*]quinoxalin-4(5H)-one DSW0421F.** The general procedure was followed using 0.2 mmol of acid **4**, 2 mL of SOCl<sub>2</sub>, morpholine (0.3 mmol), 1.0 mL of triethylamine in 7 mL of toluene to afford the product as a white solid: <sup>1</sup>H NMR (500 MHz, DMSO-*d*<sub>6</sub>) δ 12.11 (br s, 1H), 8.18 (d, *J* = 8.0 Hz, 1H), 7.19 (d, *J* = 6.5 Hz, 2H), 3.68 (br s, 4H), 3.50 (br s, 2H), 3.30 (s, 2H), 2.39 (s, 3H); <sup>13</sup>C NMR (125 MHz, DMSO-*d*<sub>6</sub>) δ 160.3, 153.7, 140.7, 140.0, 129.8, 125.2, 124.7, 119.3, 117.0, 116.1, 66.6, 66.4, 47.2, 42.4, 21.5.

## References.

- 1 Pangborn, A. B., Giardello, M. A., Grubbs, R. H., Rosen, R. K. & Timmers, F. J. Solvent system purification. *Organometallics* **15**, 1518-1520 (1996).
- 2 Iniyavan, P., Balaji, G. L., Sarveswari, S. & Vijayakumar, V. CuO nanoparticles: synthesis and application as an efficient reusable catalyst for the preparation of xanthene substituted 1,2,3-triazoles via click chemistry. *Tetrahedron Lett.* **56**, 5002-5009, doi:<https://doi.org/10.1016/j.tetlet.2015.07.016> (2015).
- 3 Biagi, G., Giorgi, I., Livi, O., Scartoni, V., Betti, L., Giannaccini, G. & Trincavelli, M. L. New 1,2,3-triazolo[1,5-*a*]quinoxalines: synthesis and binding to benzodiazepine and adenosine receptors. II. *Eur. J. Med. Chem.* **37**, 565-571, doi:[http://dx.doi.org/10.1016/S0223-5234\(02\)01376-4](http://dx.doi.org/10.1016/S0223-5234(02)01376-4) (2002).
- 4 Bertelli, L., Biagi, G., Giorgi, I., Manera, C., Livi, O., Scartoni, V., Betti, L., Giannaccini, G., Trincavelli, L. & Barili, P. L. 1,2,3-Triazolo[1,5-*a*]quinoxalines: synthesis and binding to benzodiazepine and adenosine receptors. *Eur. J. Med. Chem.* **33**, 113-122, doi:[http://dx.doi.org/10.1016/S0223-5234\(98\)80036-6](http://dx.doi.org/10.1016/S0223-5234(98)80036-6) (1998).

**Supplemental Figure 1. Analogs of 0475 not displaying activity.** Cultures of JCC157, which contains *Pshp3-luxAB*, were treated with: DMSO, 20 nM SHP3, or 25  $\mu$ M of (A) library compounds 0475, 0112, 0142, 0149, 0776, or 0778 (B) designed synthetic analogs DSW-20C, 20D, 21D, 21E, 21F, and 21C. Plotted as maximum relative light units (RLU) from a single time point. Experiment was conducted in triplicate.

**A**

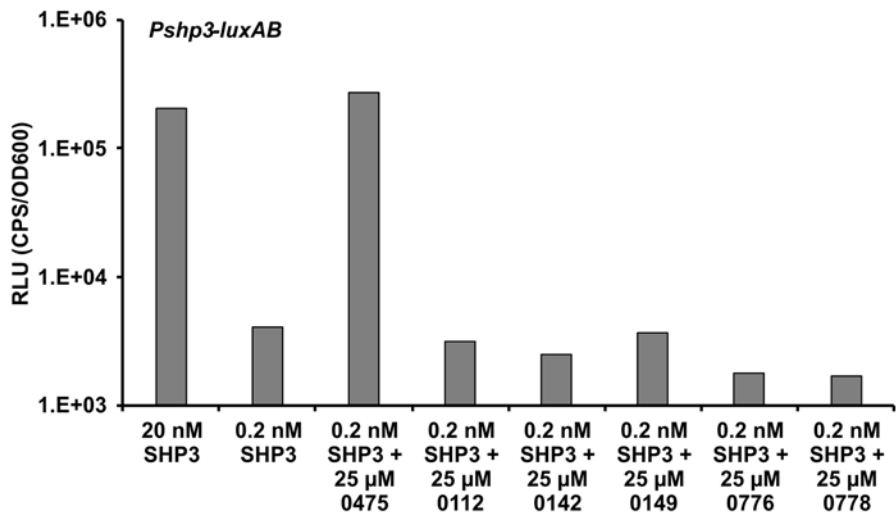

**B**

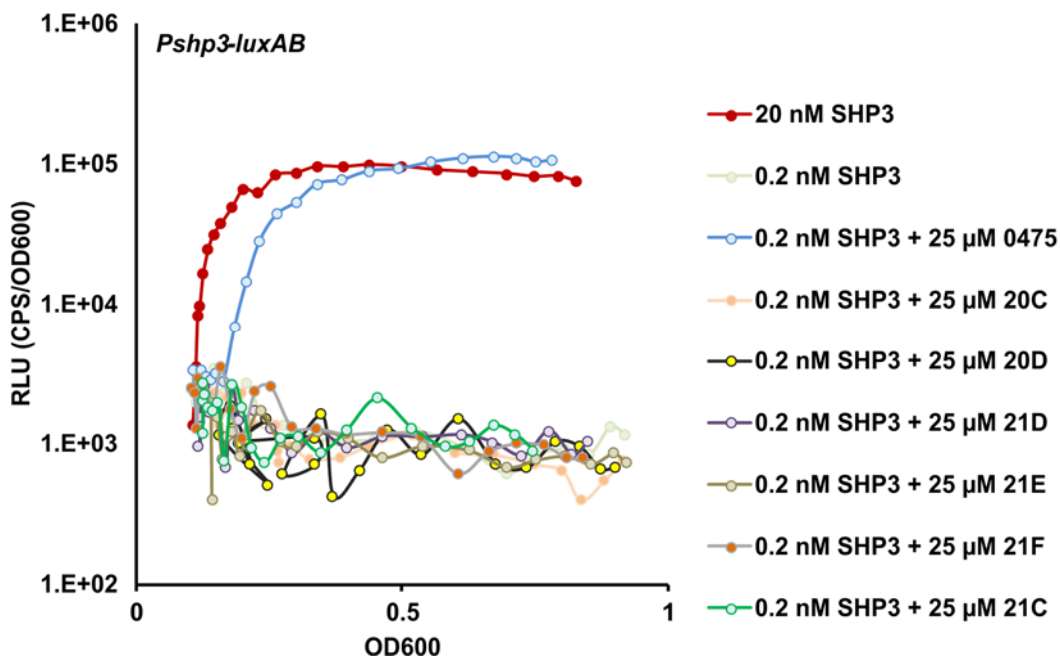

**A**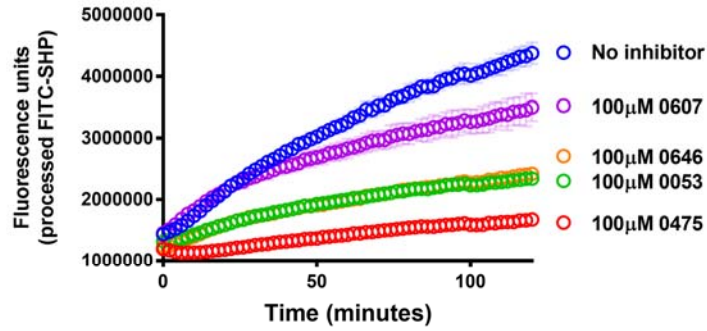**B**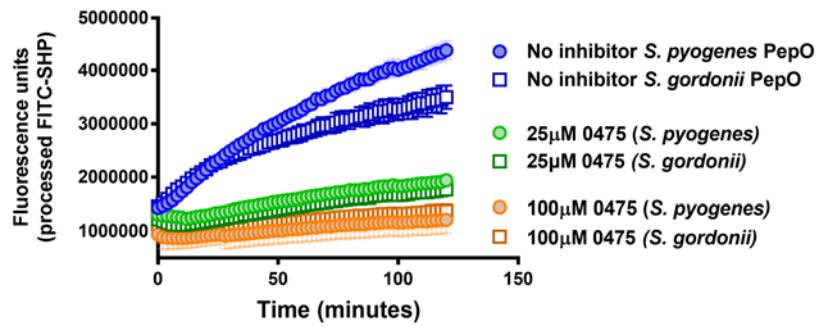

**Supplemental Figure 2. Activity of 0475 analogs, and inhibition of PepO ortholog.** (A) 0475 analogs were tested for inhibition of *S. pyogenes* rPepO. 10 nM rPepO was preincubated with each analog before 100  $\mu$ M FAM-SHP2-QXL peptide was added to the reactions and fluorescence emission was measured over time. Reactions were conducted in triplicate with standard error indicated as bars. (B) 0475 was compared for its activity on rPepO from *Streptococcus pyogenes* (circles) and *Streptococcus gordonii* (squares). 10 nM rPepO was preincubated with each concentration of 0475 (0, 25 $\mu$ M, 100 $\mu$ M) before 100  $\mu$ M FAM-SHP2-QXL peptide was added to the reactions and fluorescence emission was measured over time. Reactions were conducted in triplicate with standard error indicated as bars.

H1 standard parameters, BBO probe.

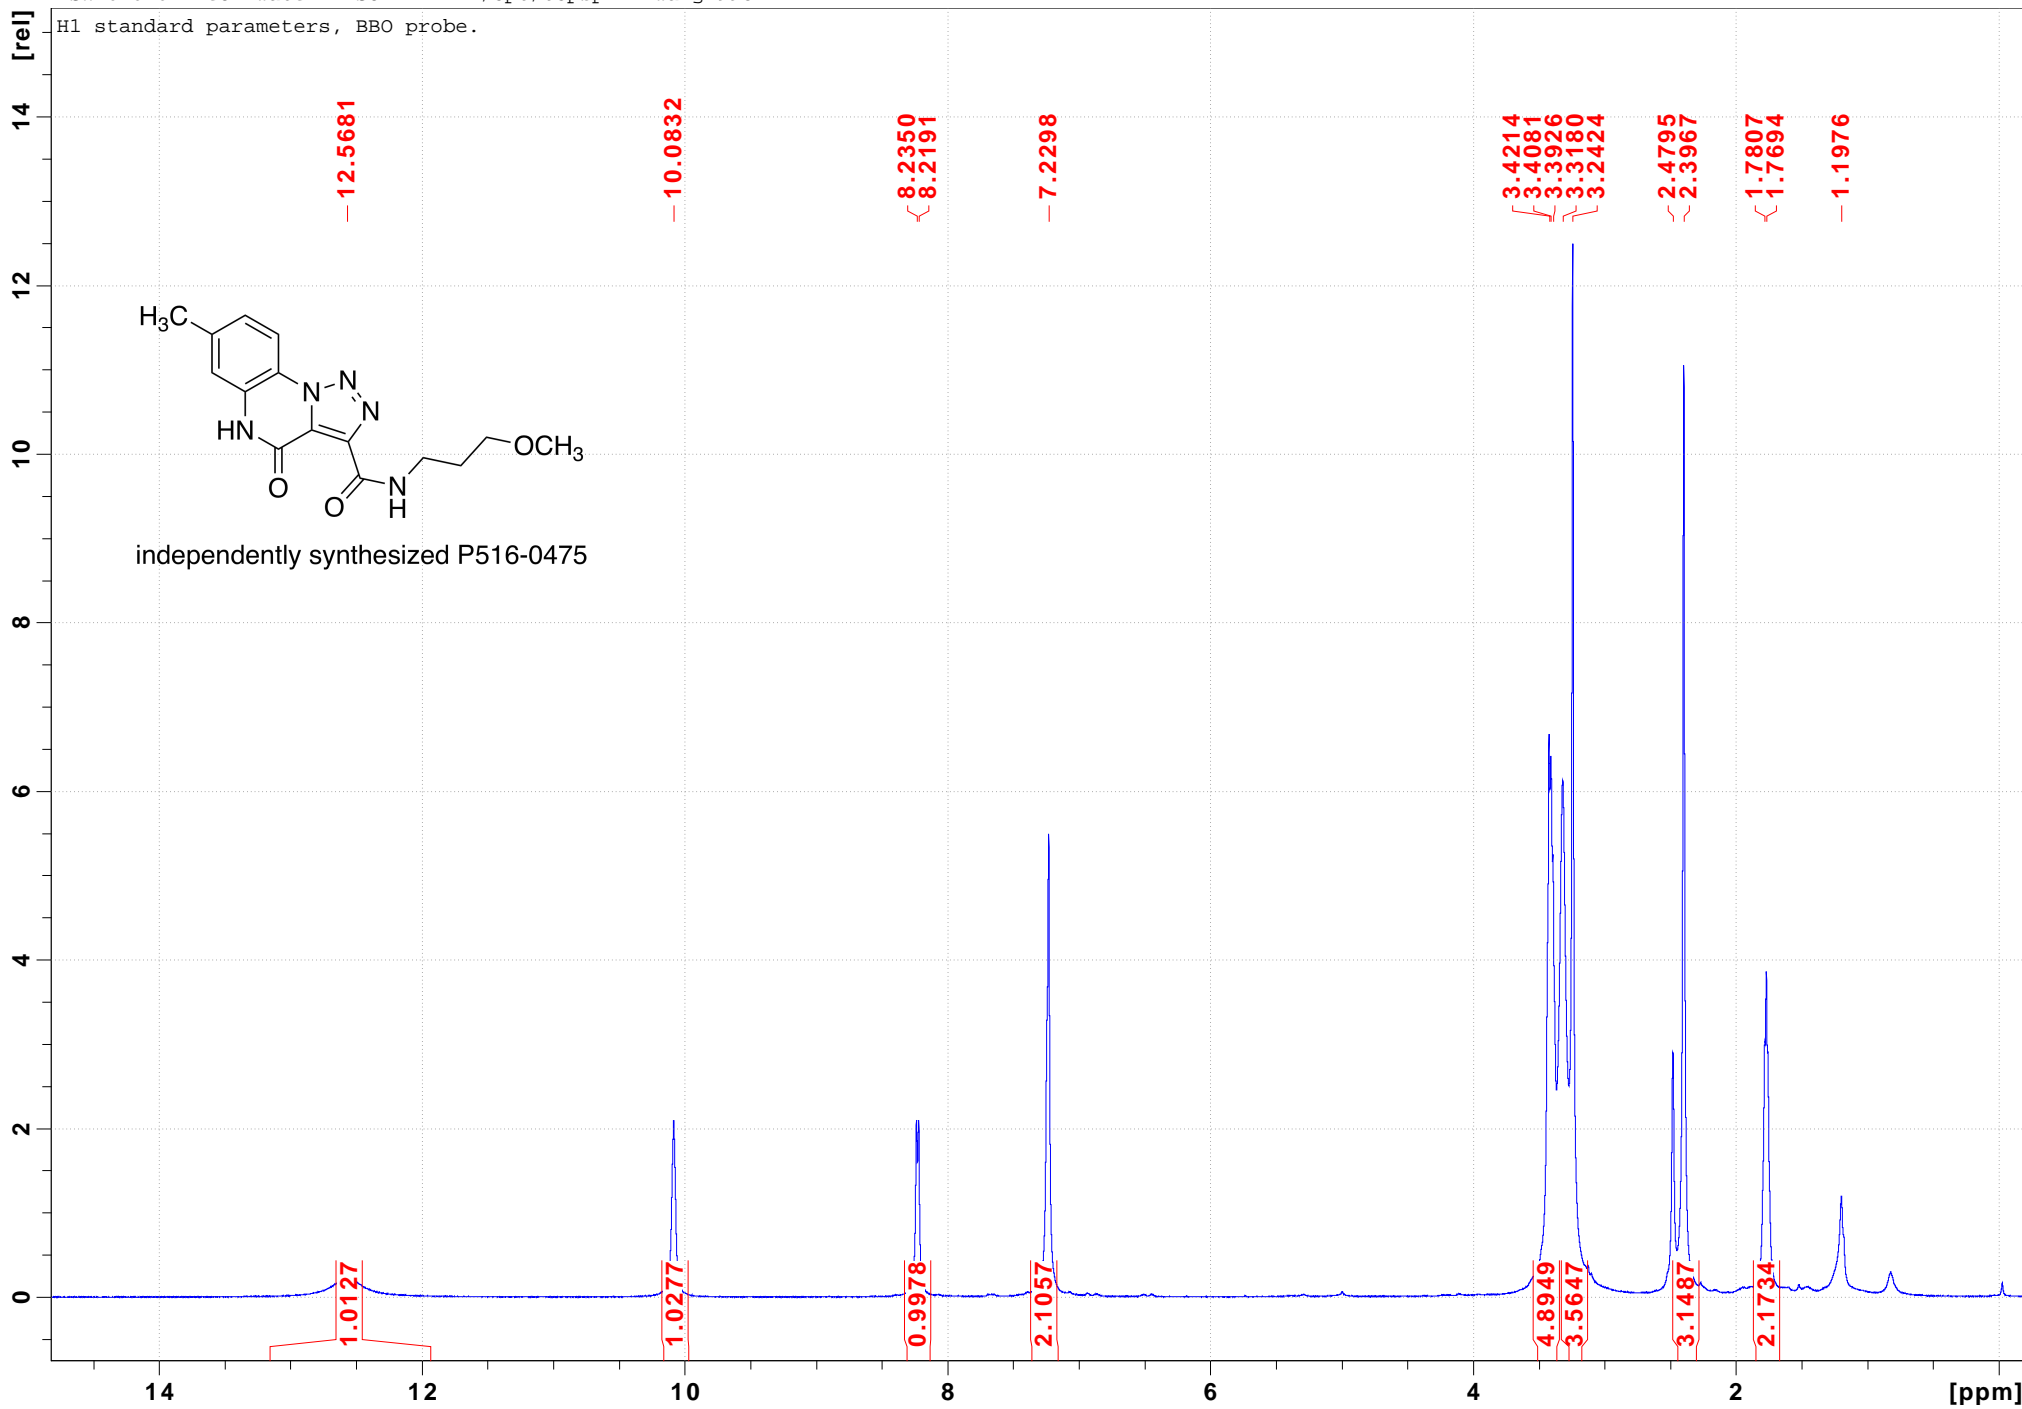



C13 standard parameters, BBO probe.

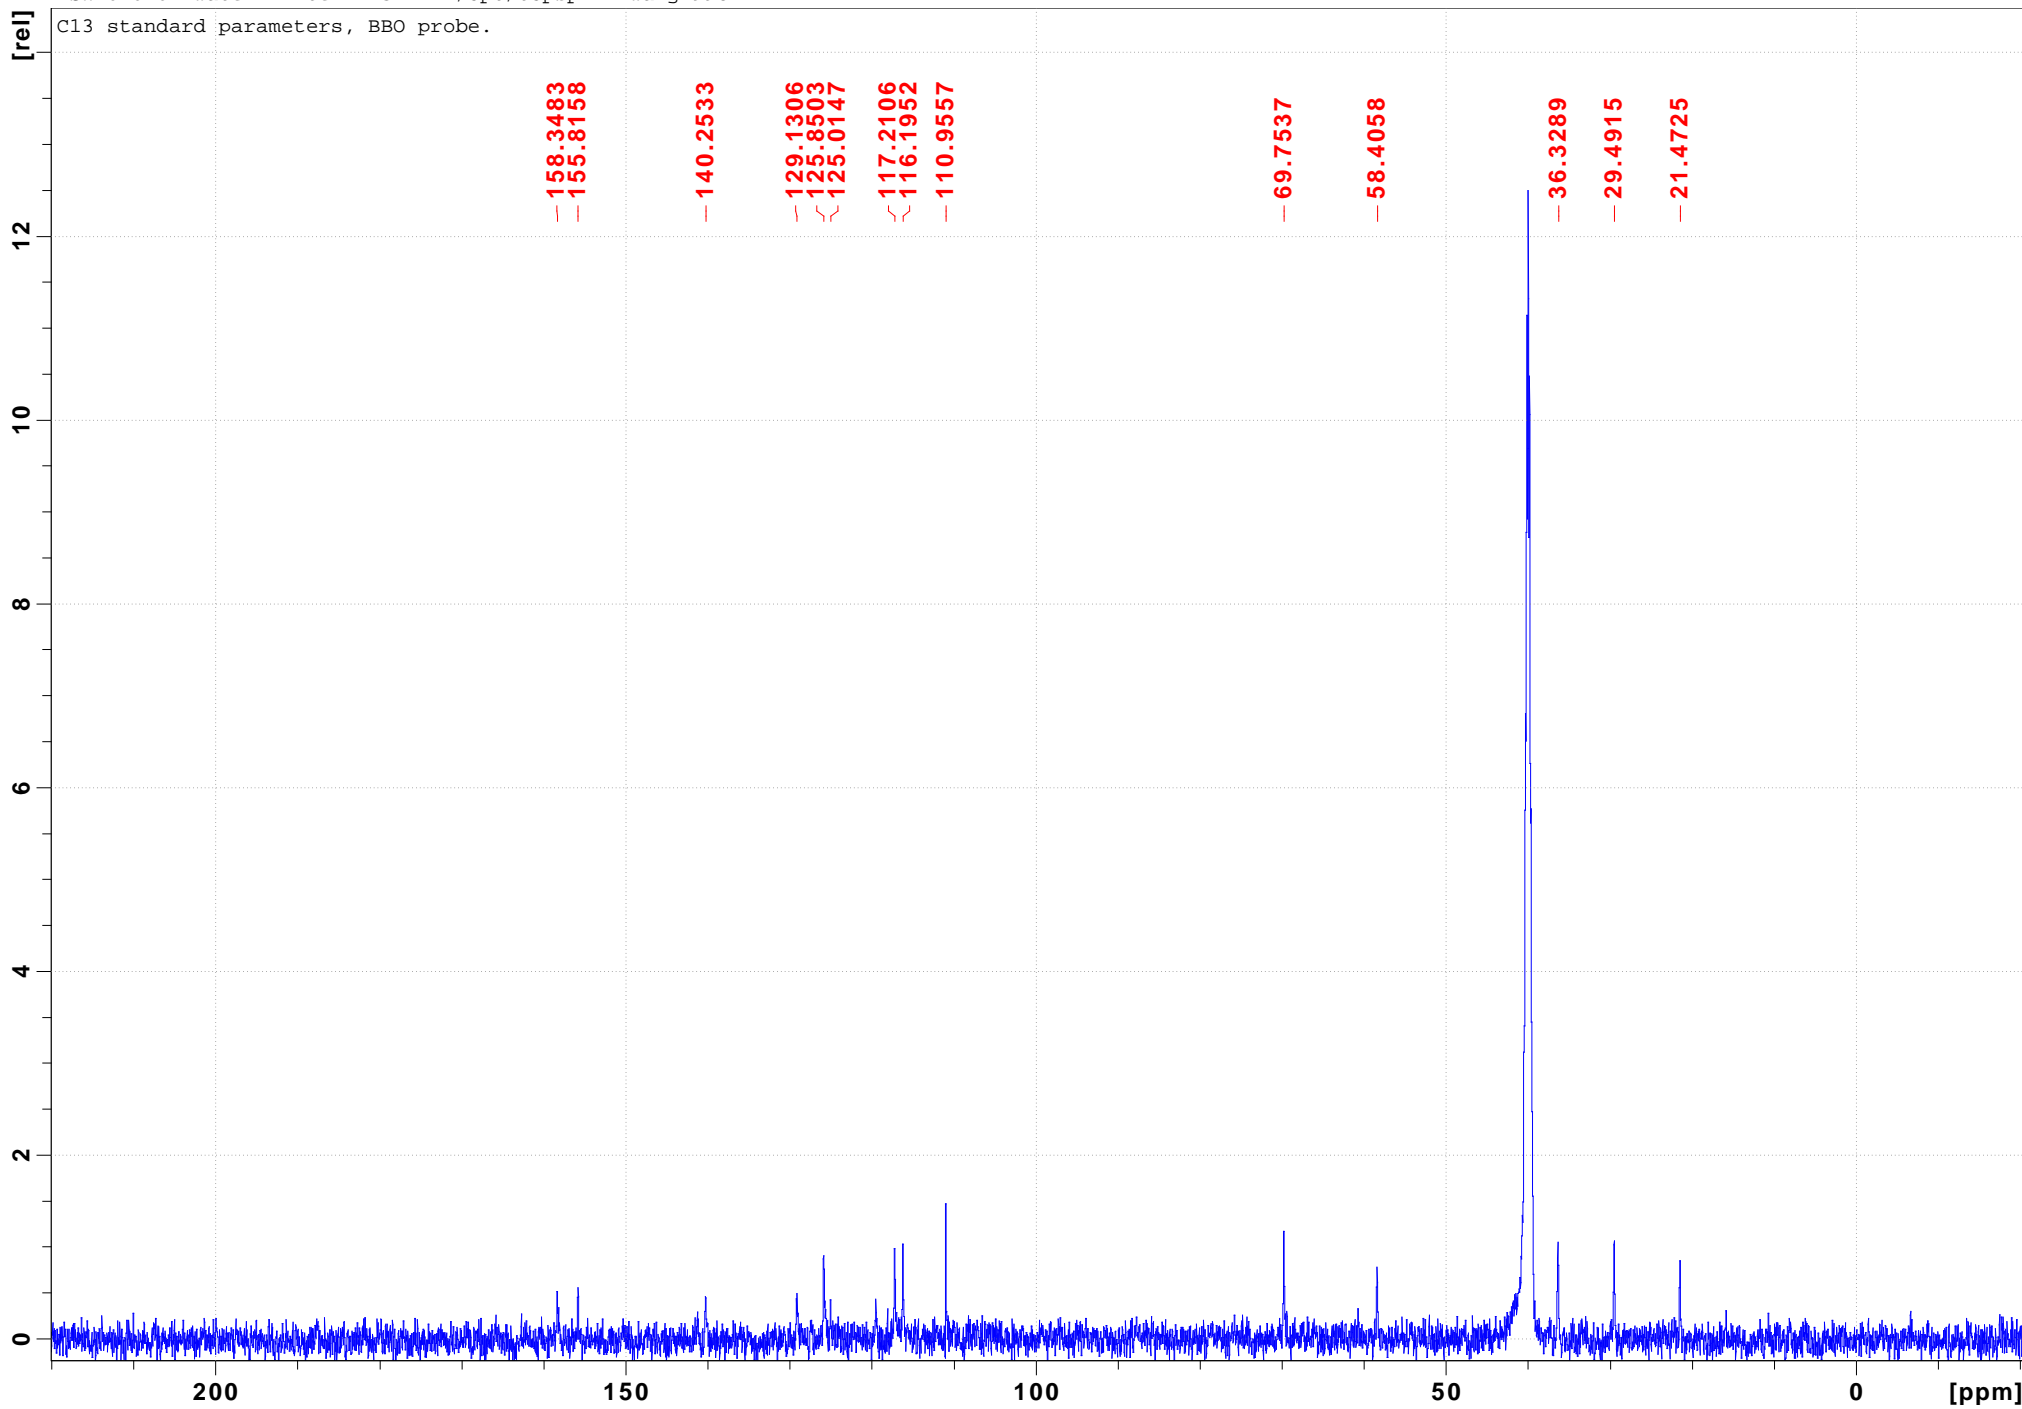

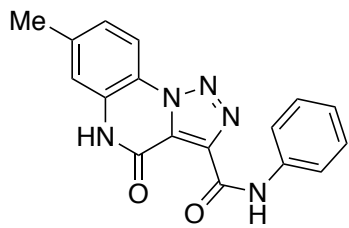

**DSW0420C**

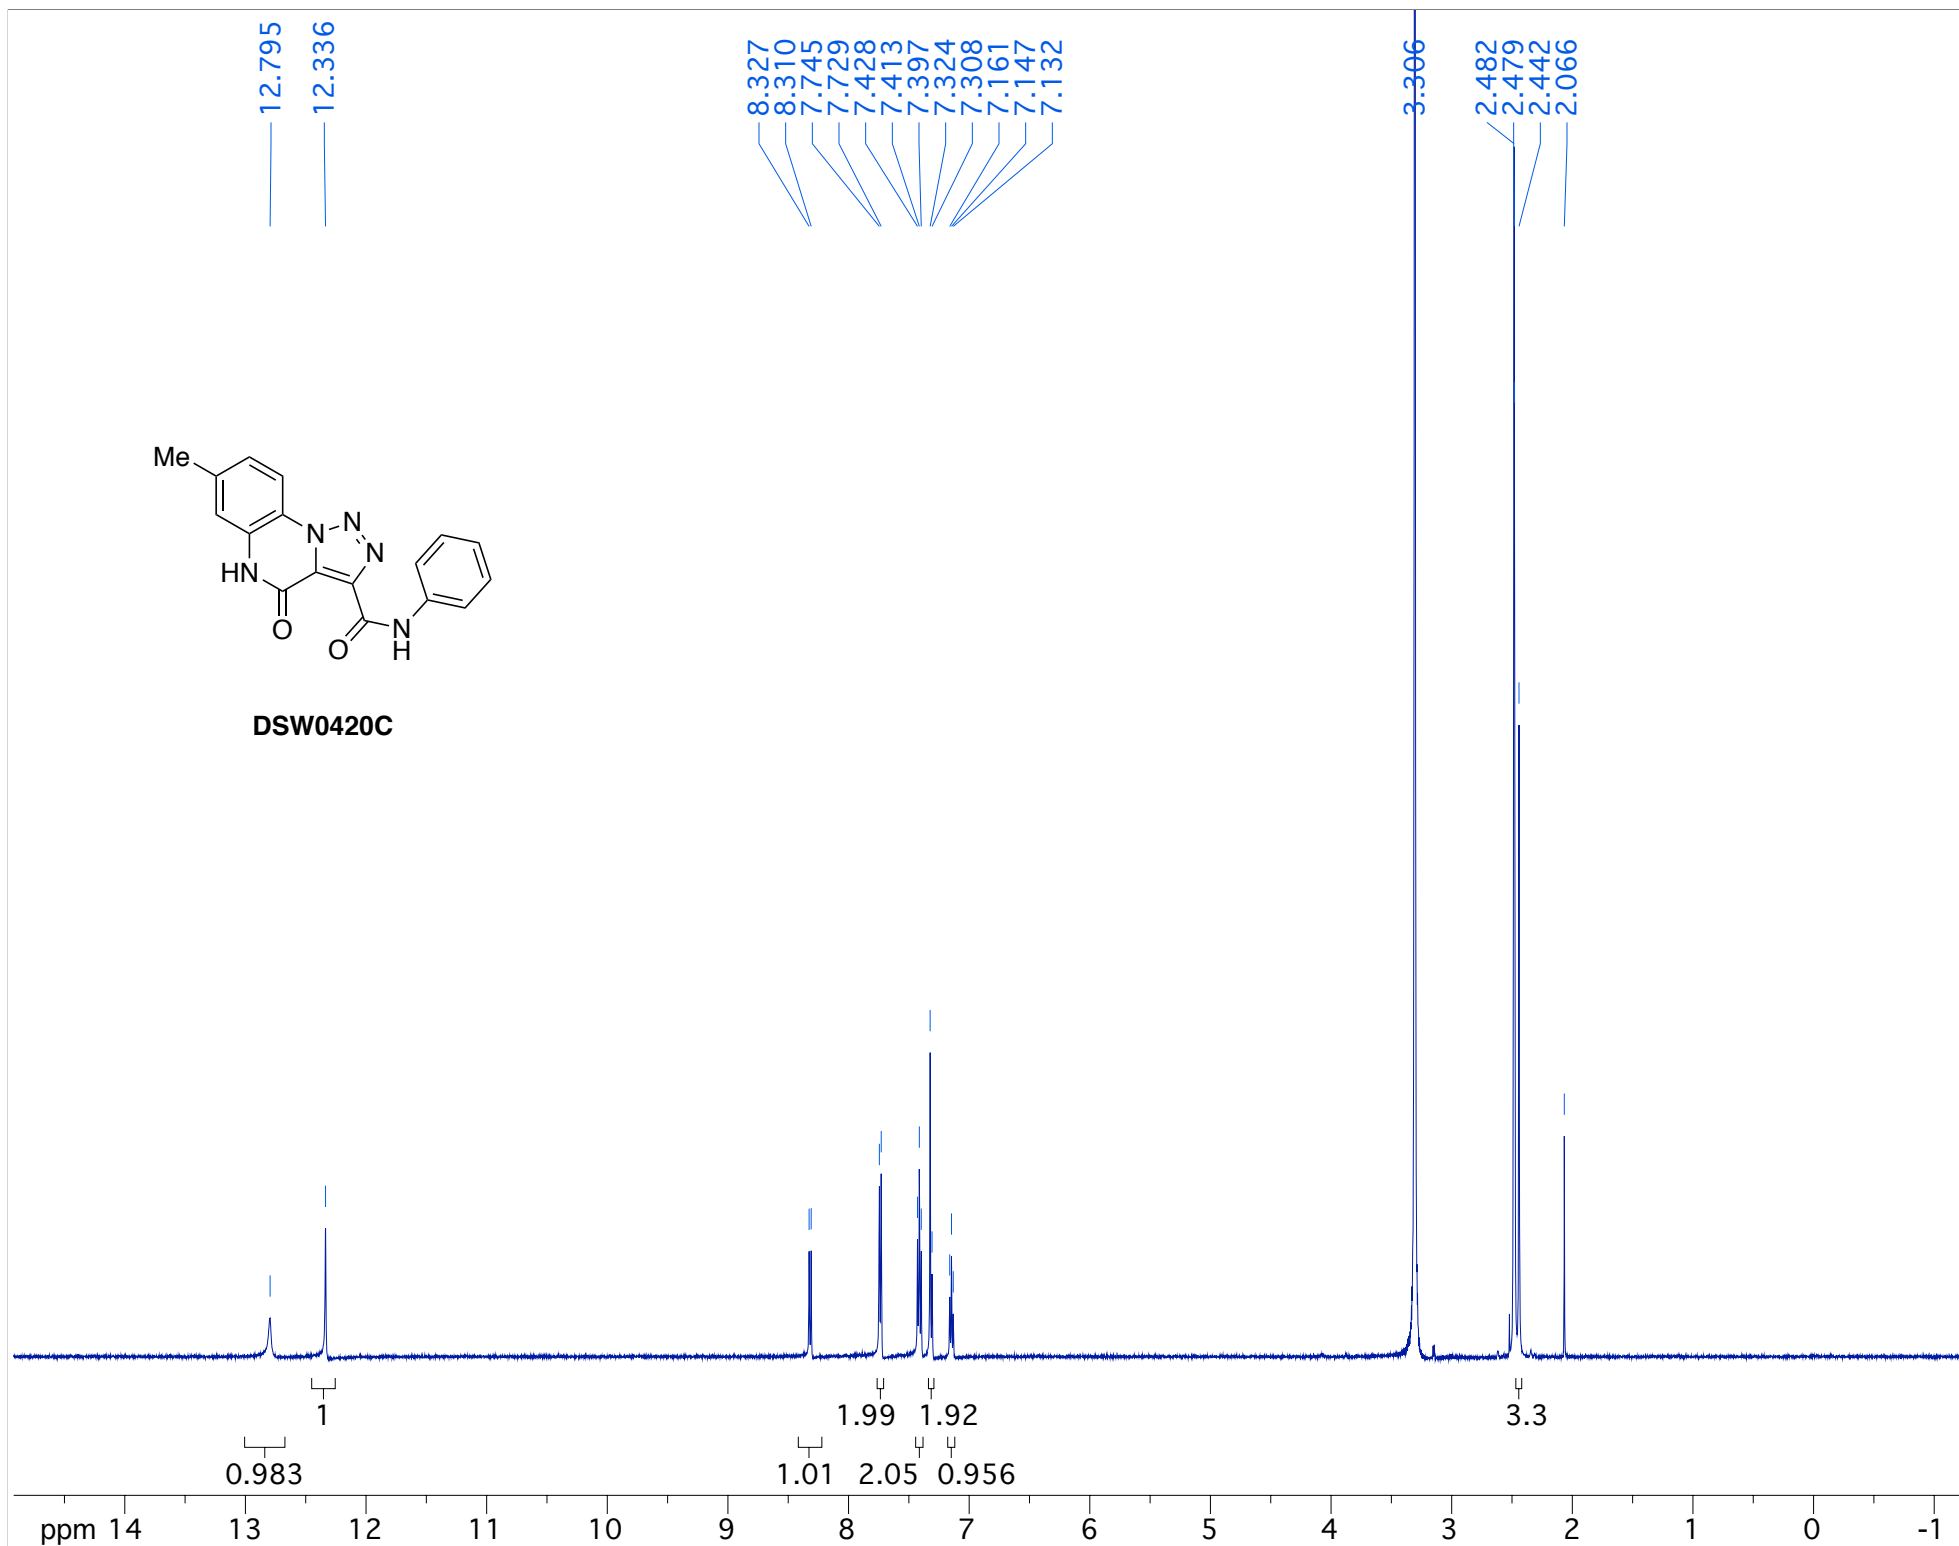

xg-re-DSW-04020C-dmso 2 1 /opt/topspin xguan8

xg-re-DSW-04020C-13C-DMSO

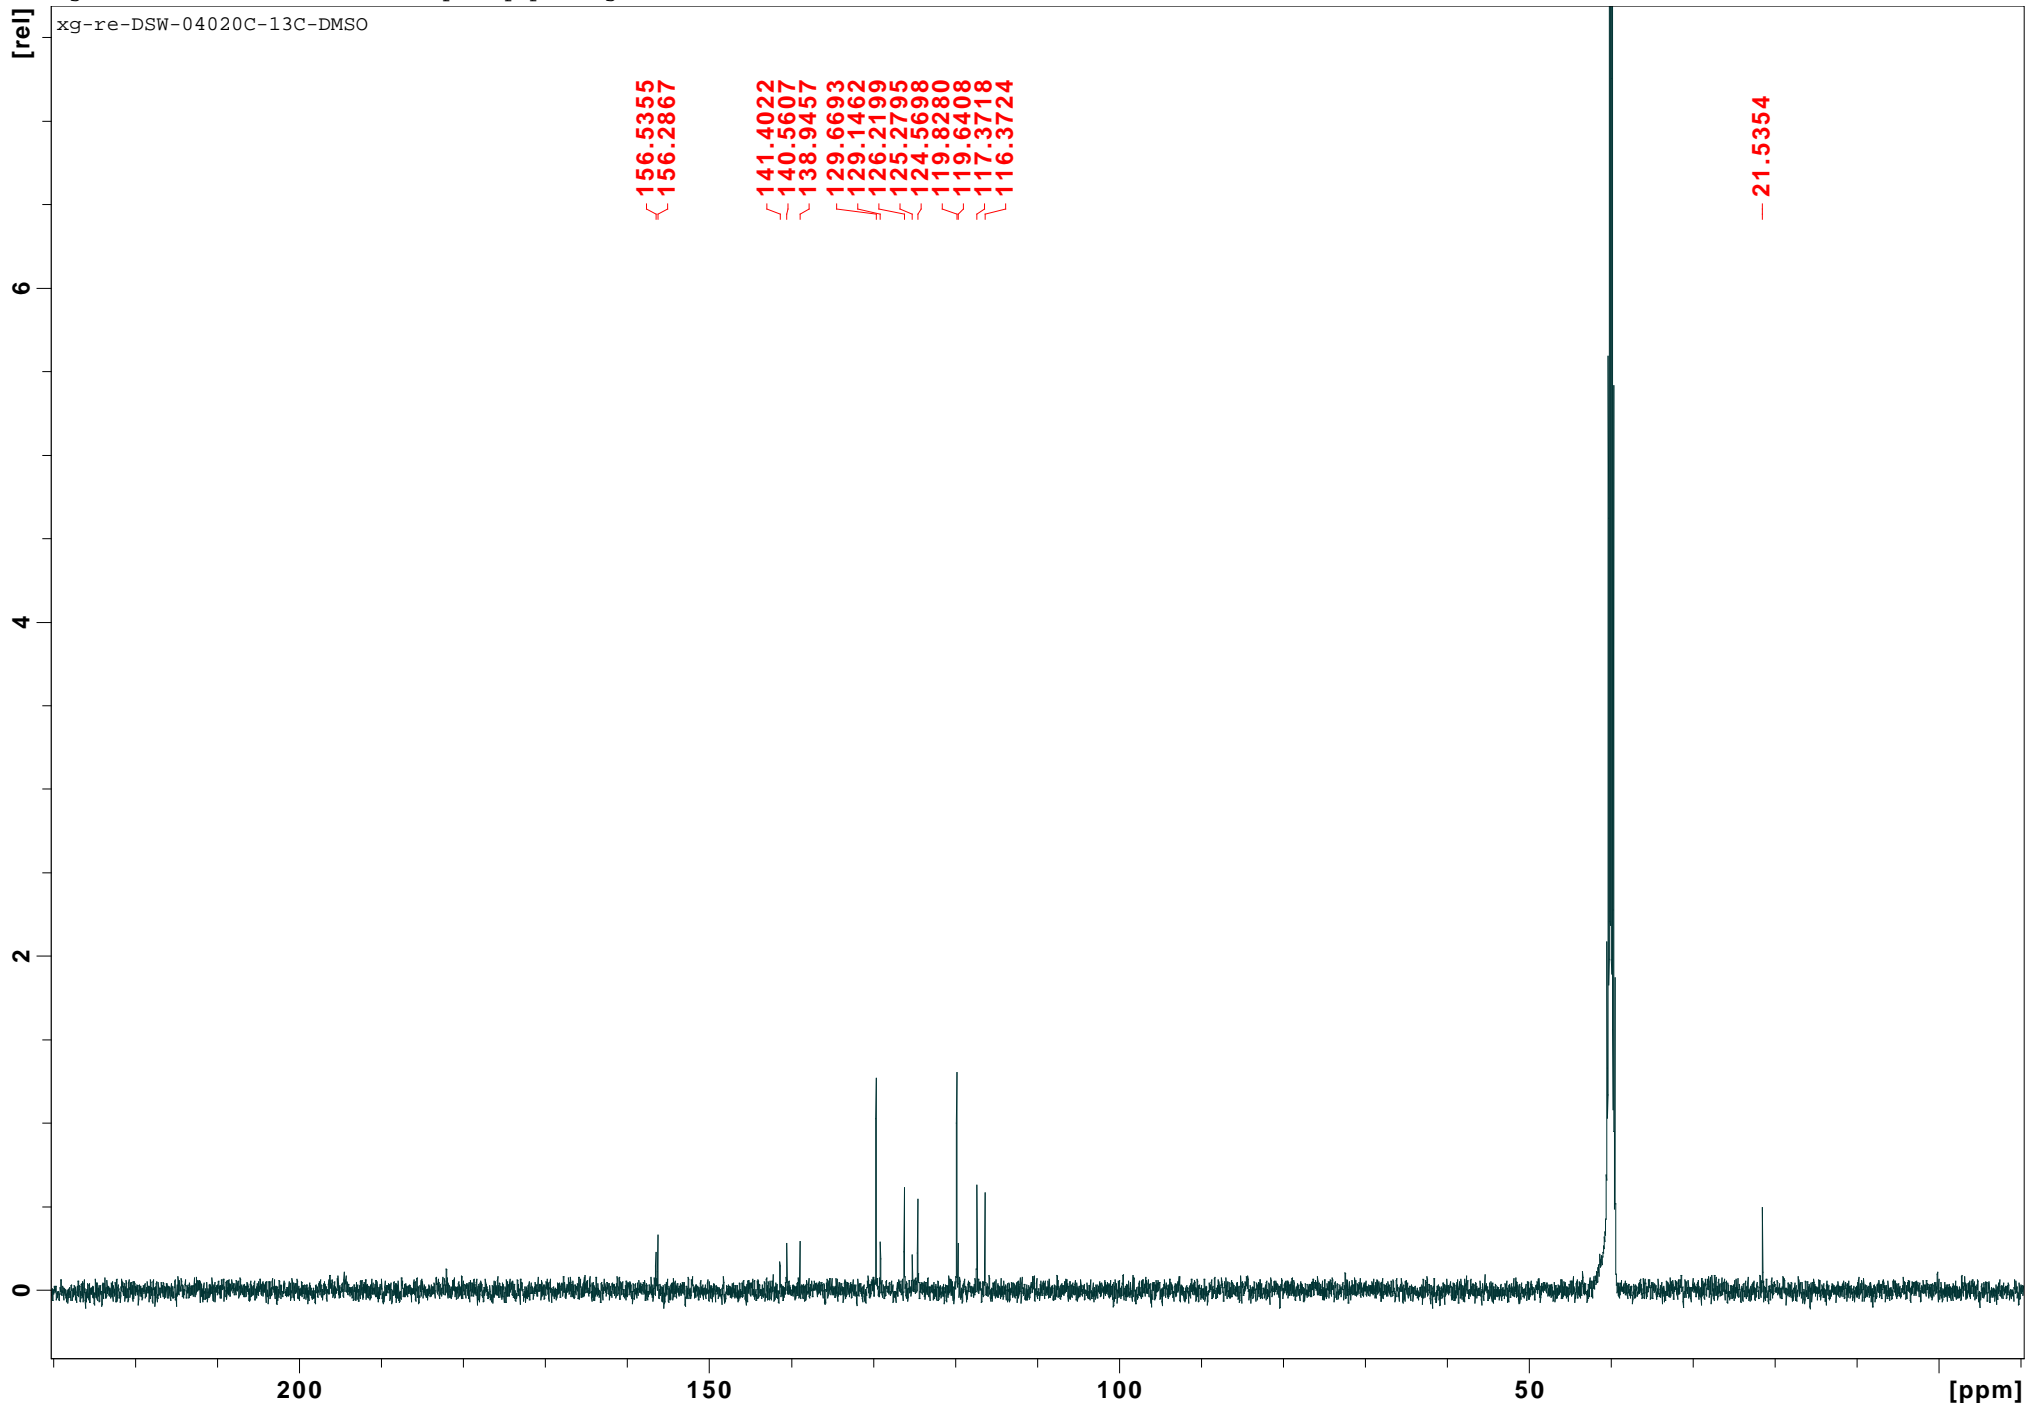

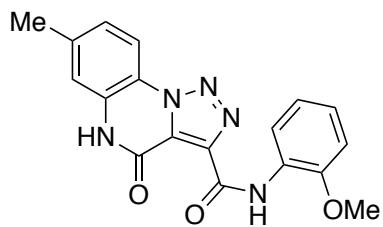

**DSW0420D**

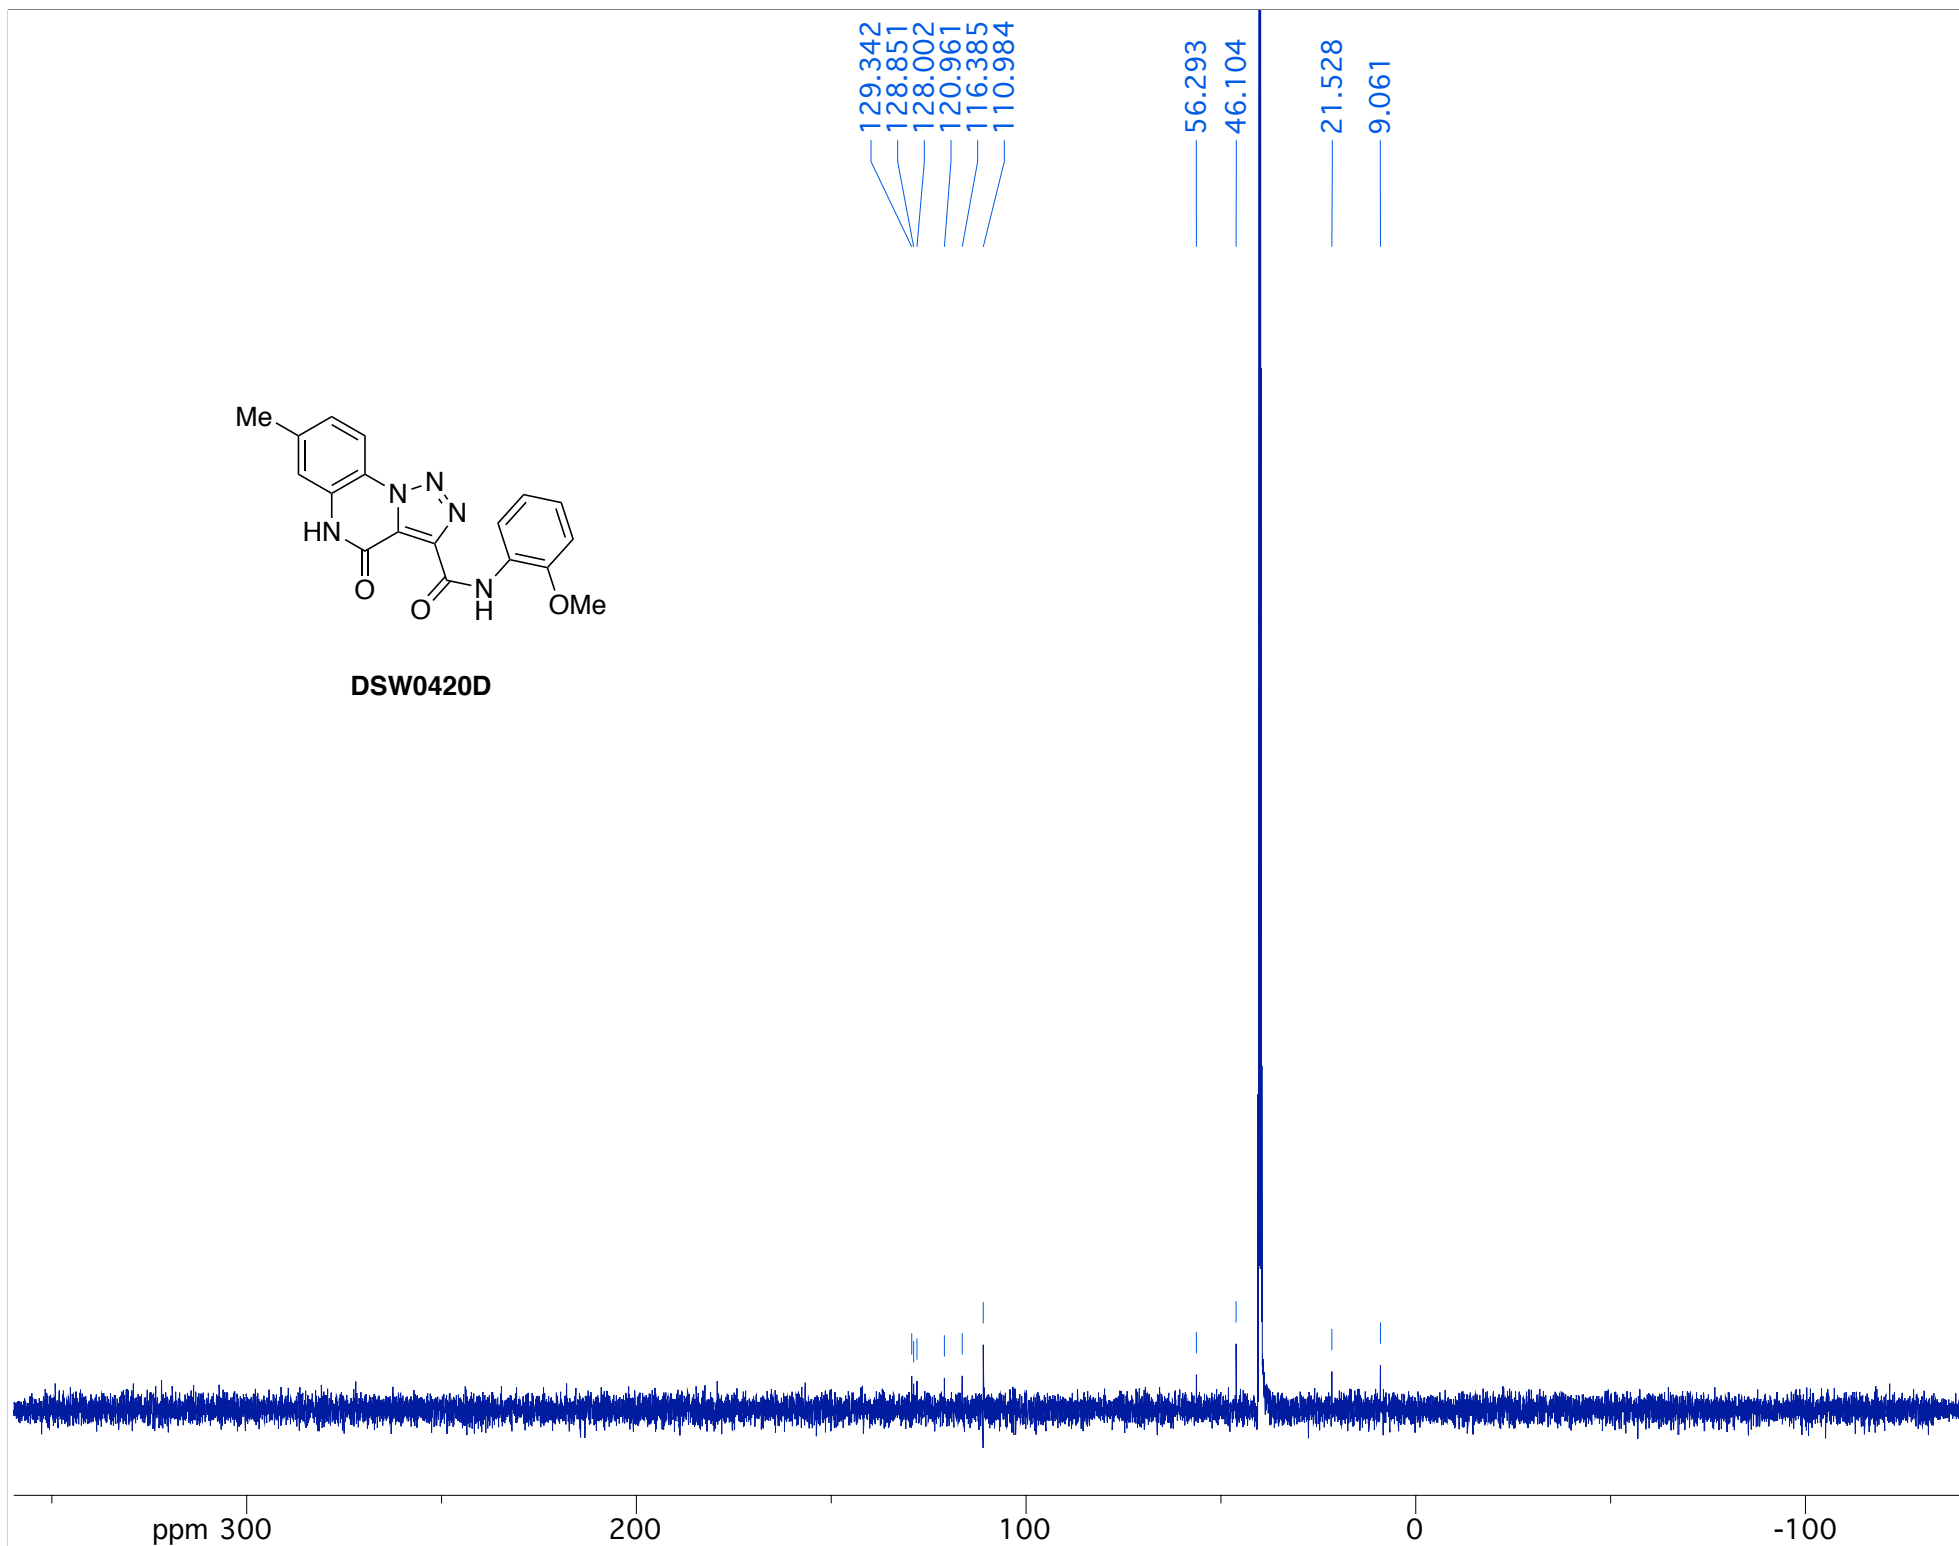

xg-re-DSW-04020D-dmso 2 1 /opt/topspin xguan8

xg-re-DSW-04020D-13C-dmso

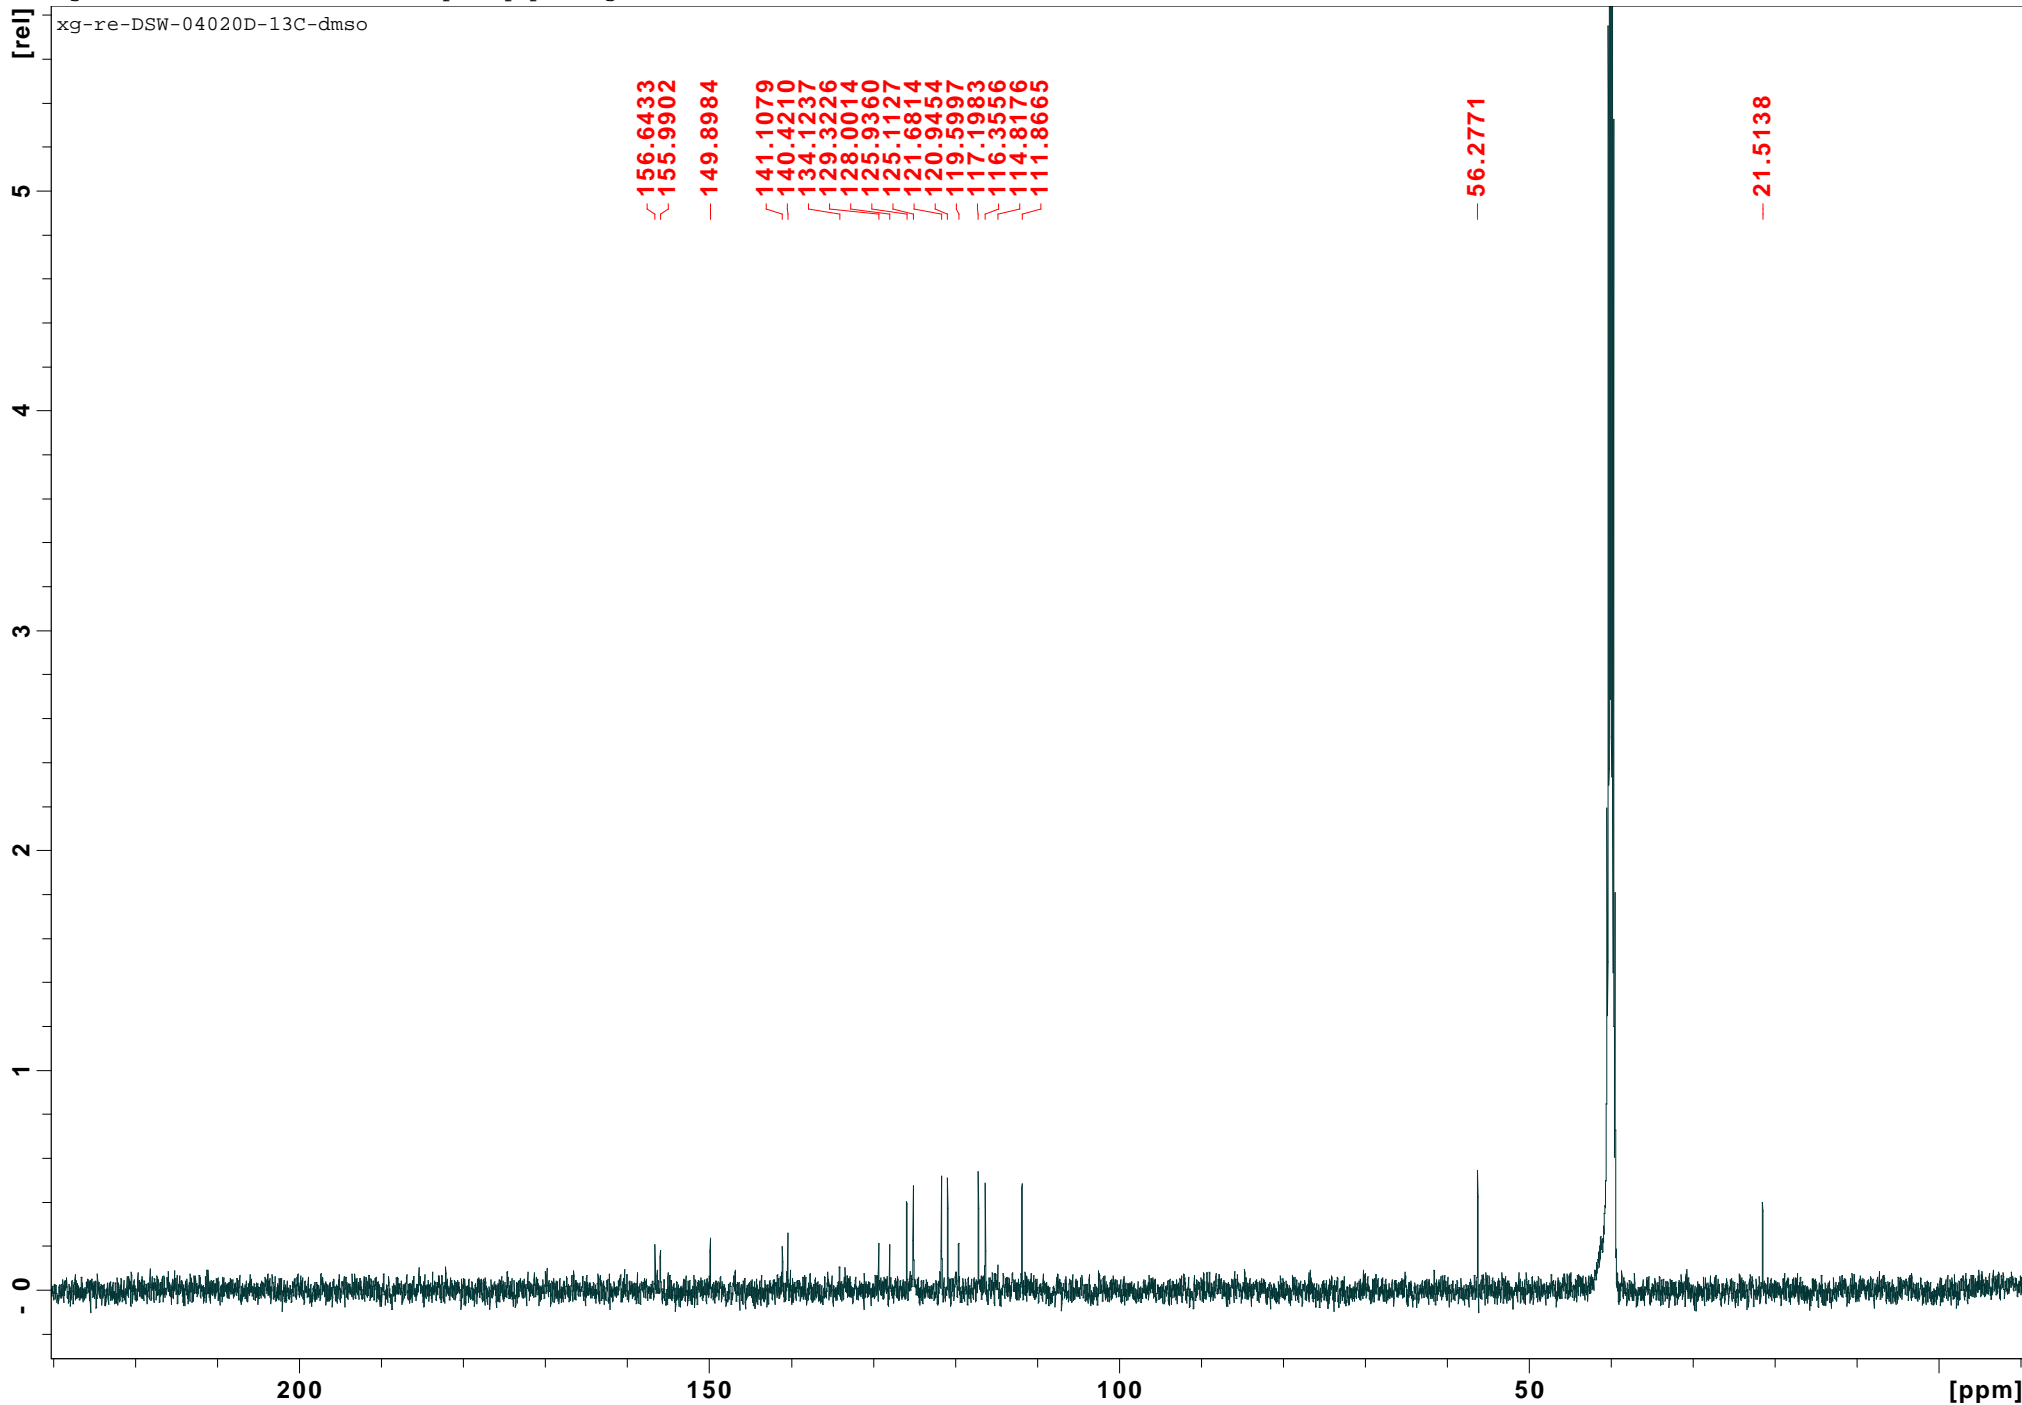

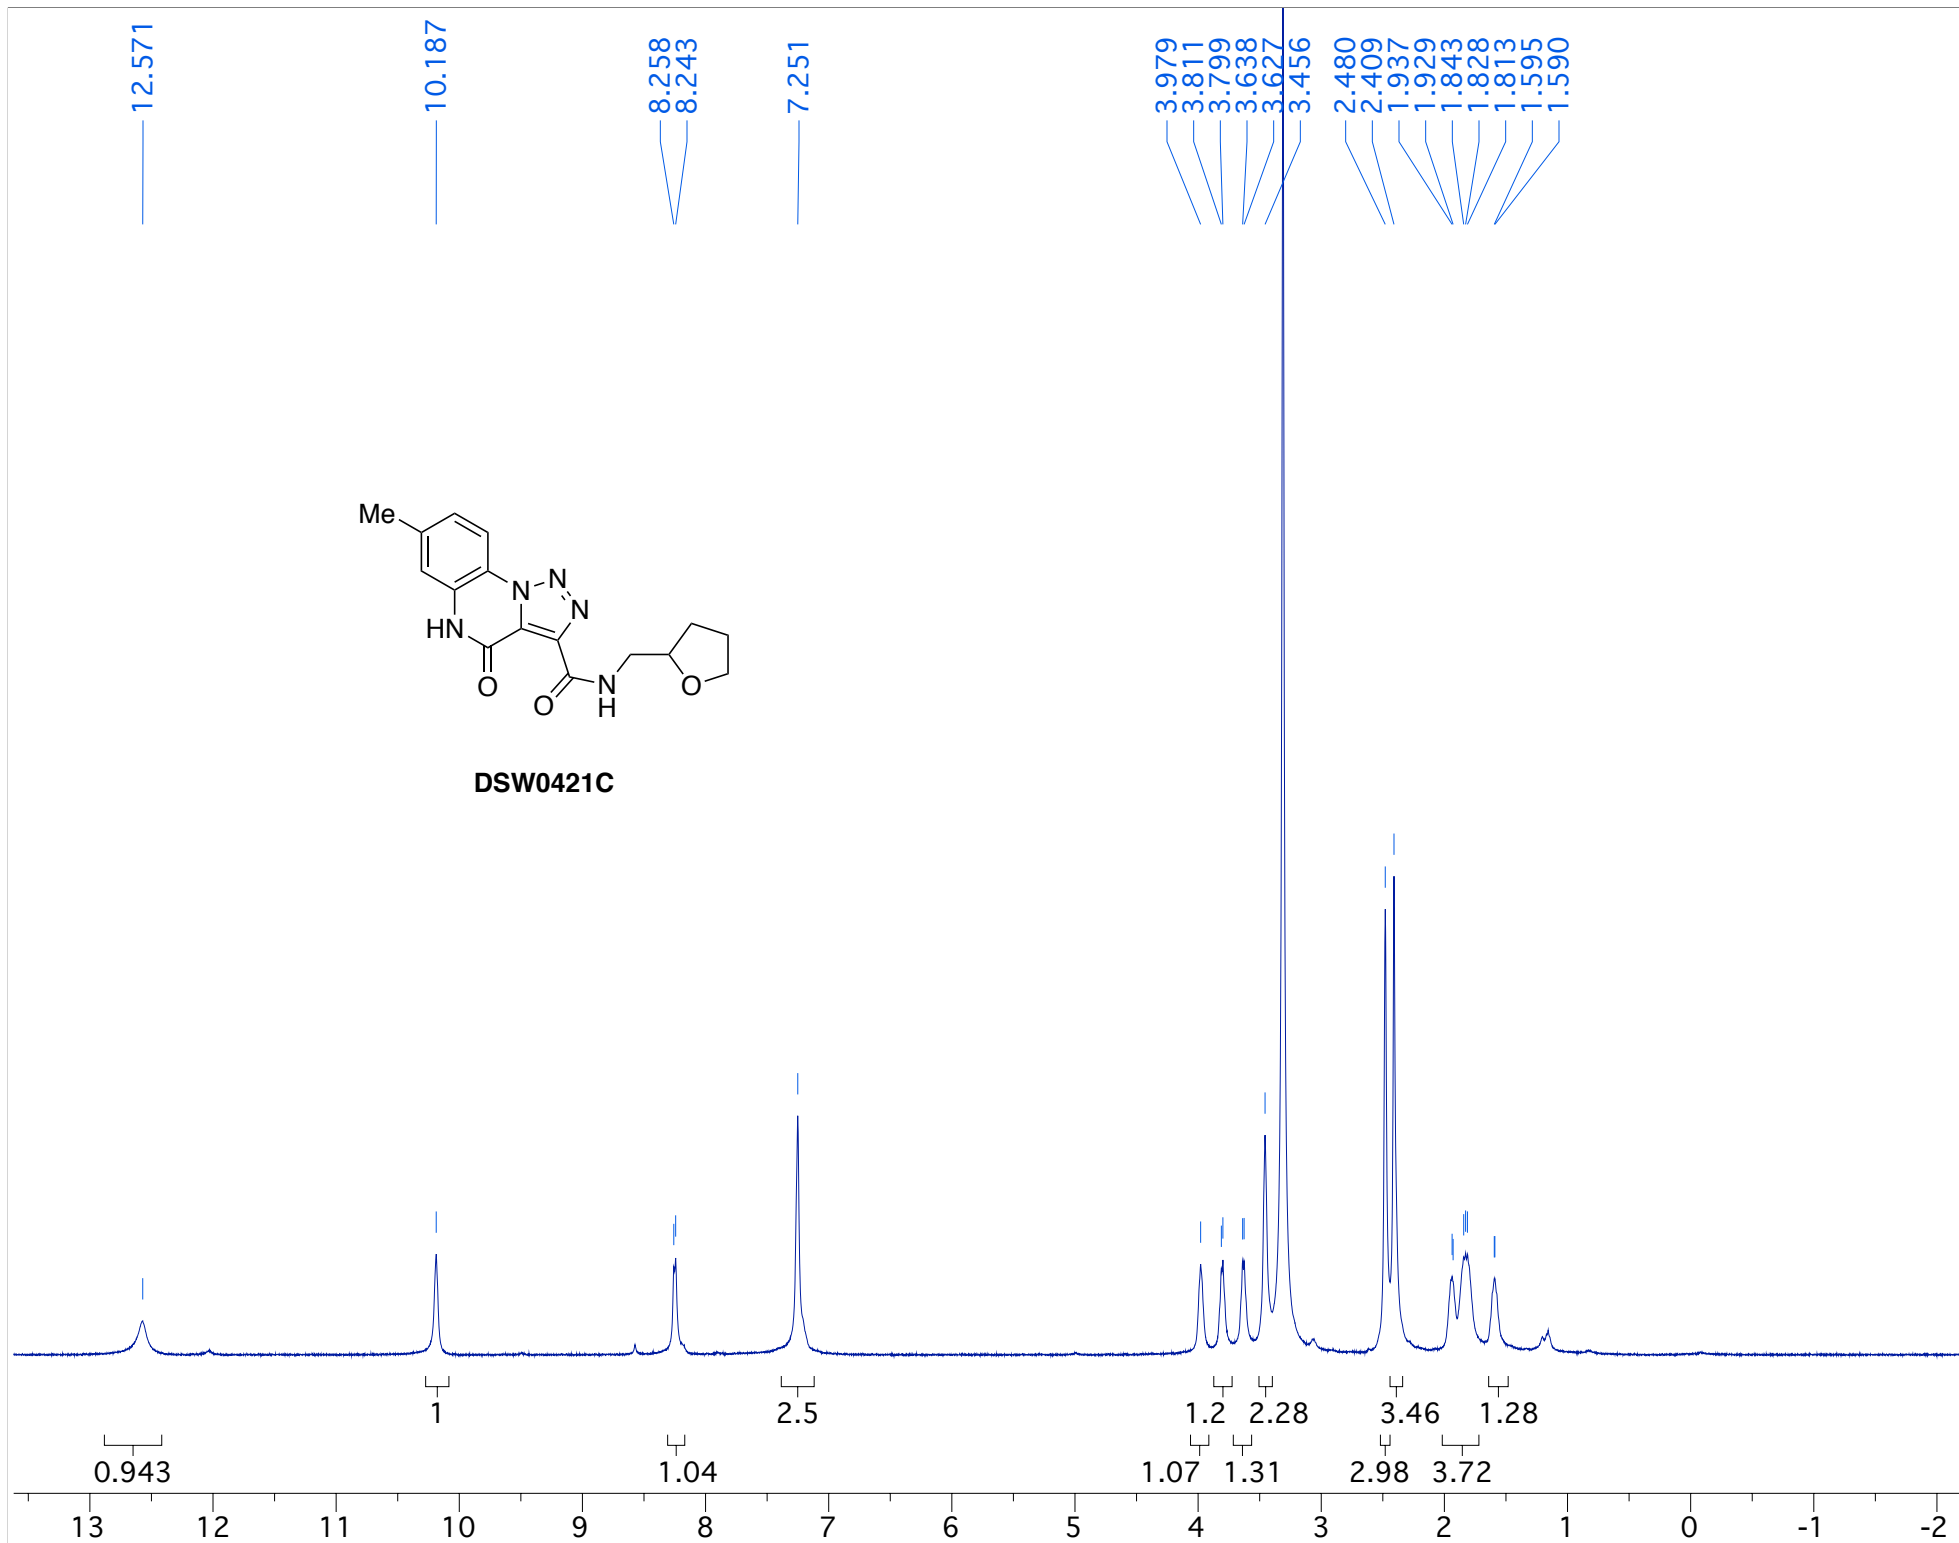

xg-re-DSW-04021C-dmso 2 1 /opt/topspin xguan8

xg-re-DSW-04021C-13C-dmso

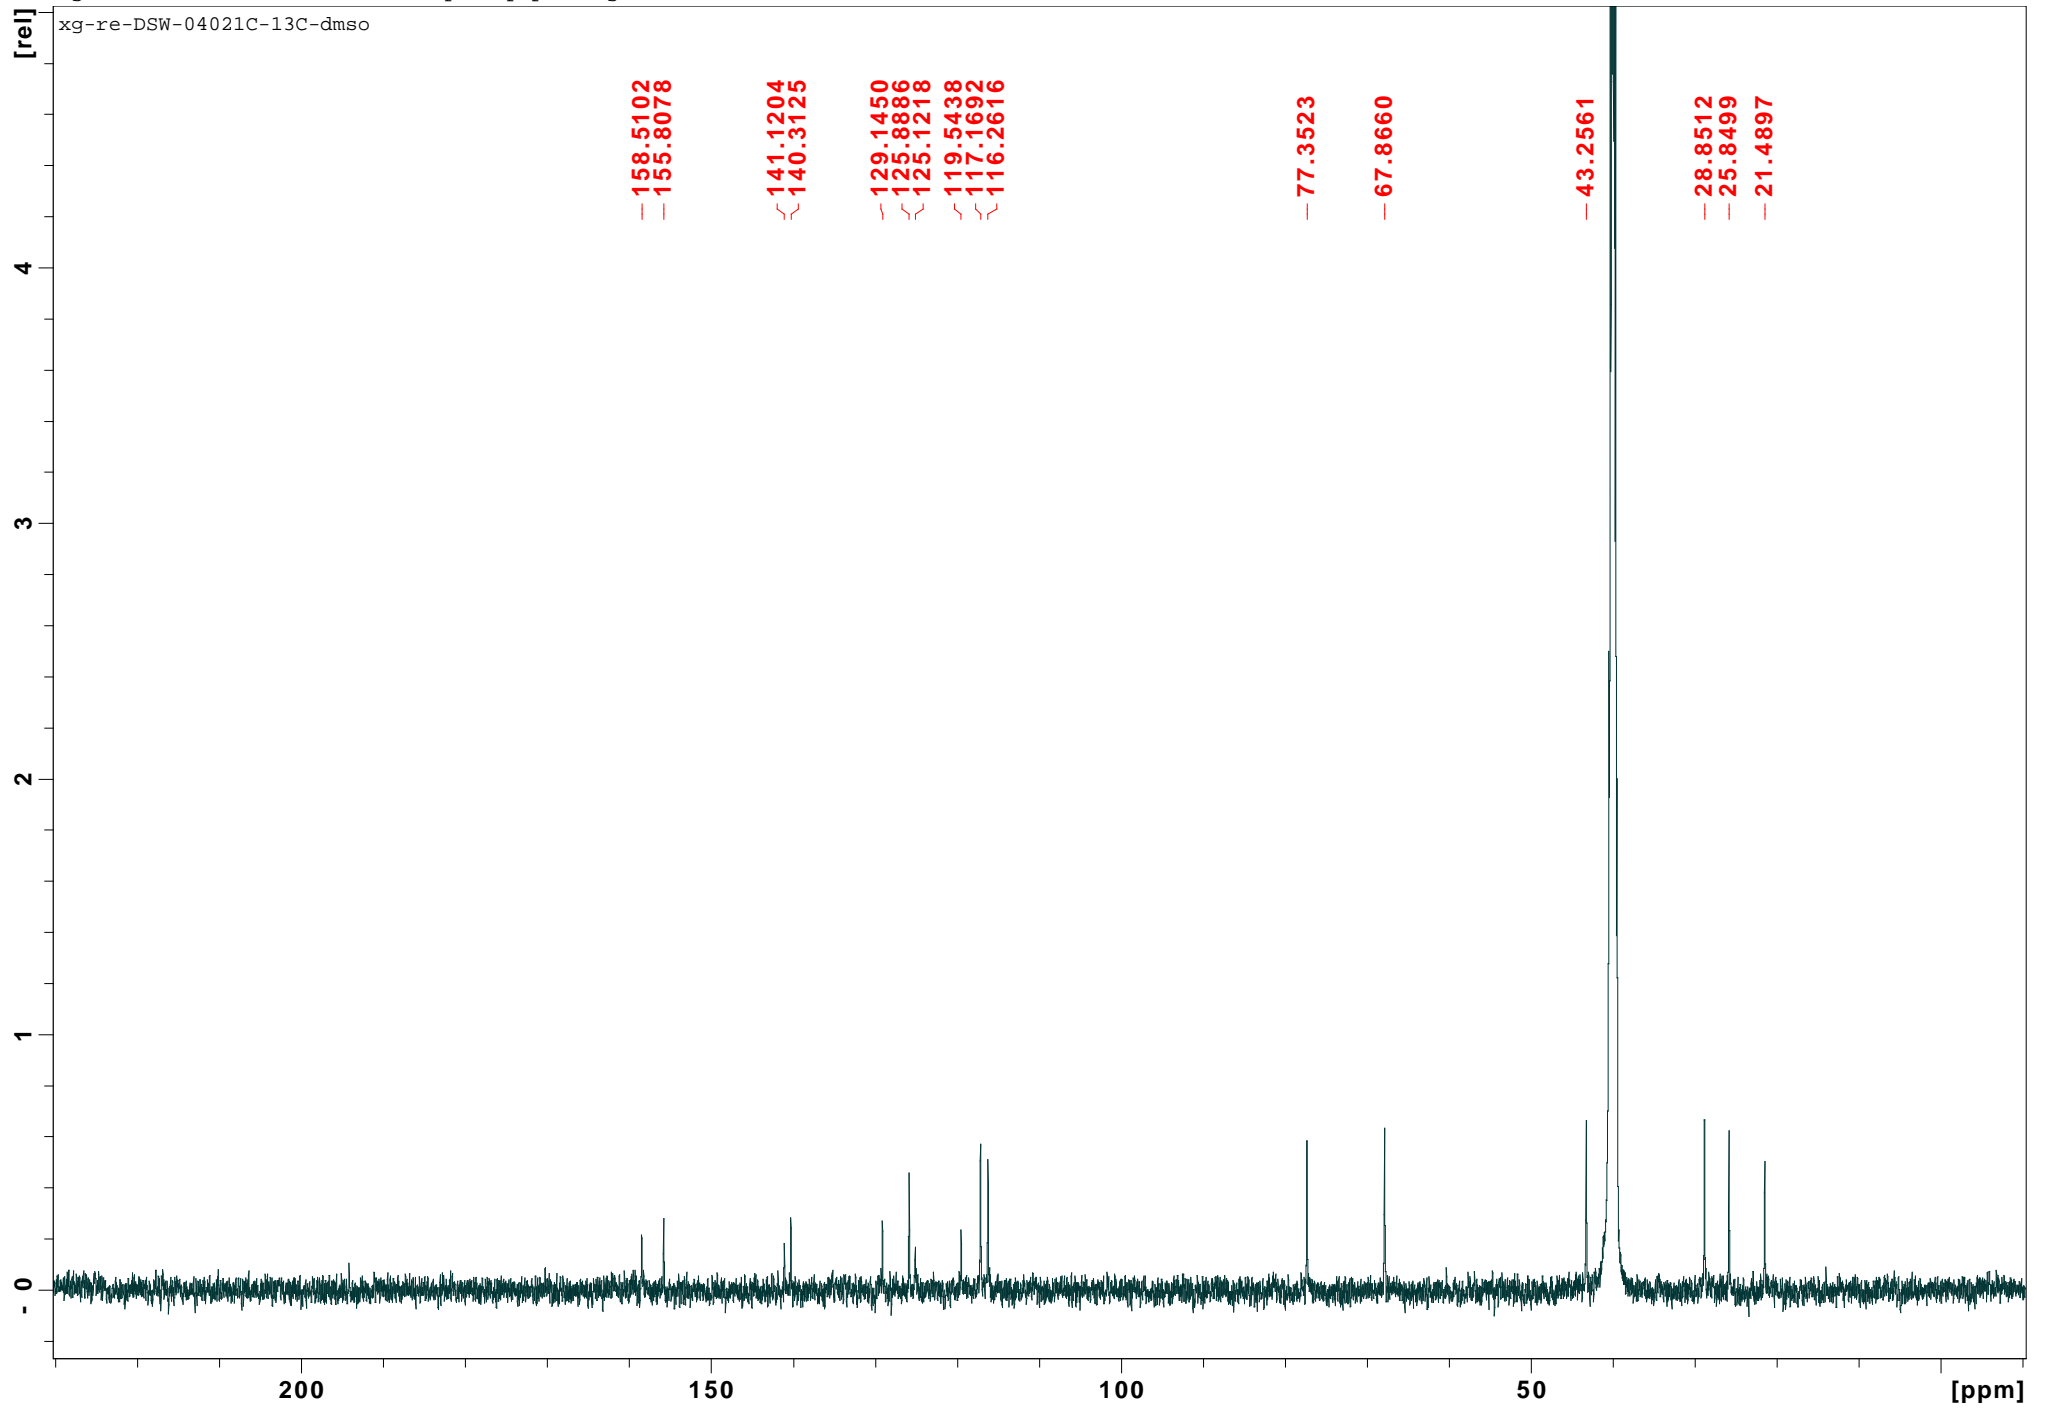

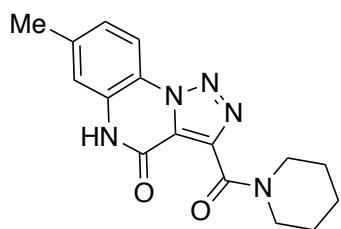

DSW0421E

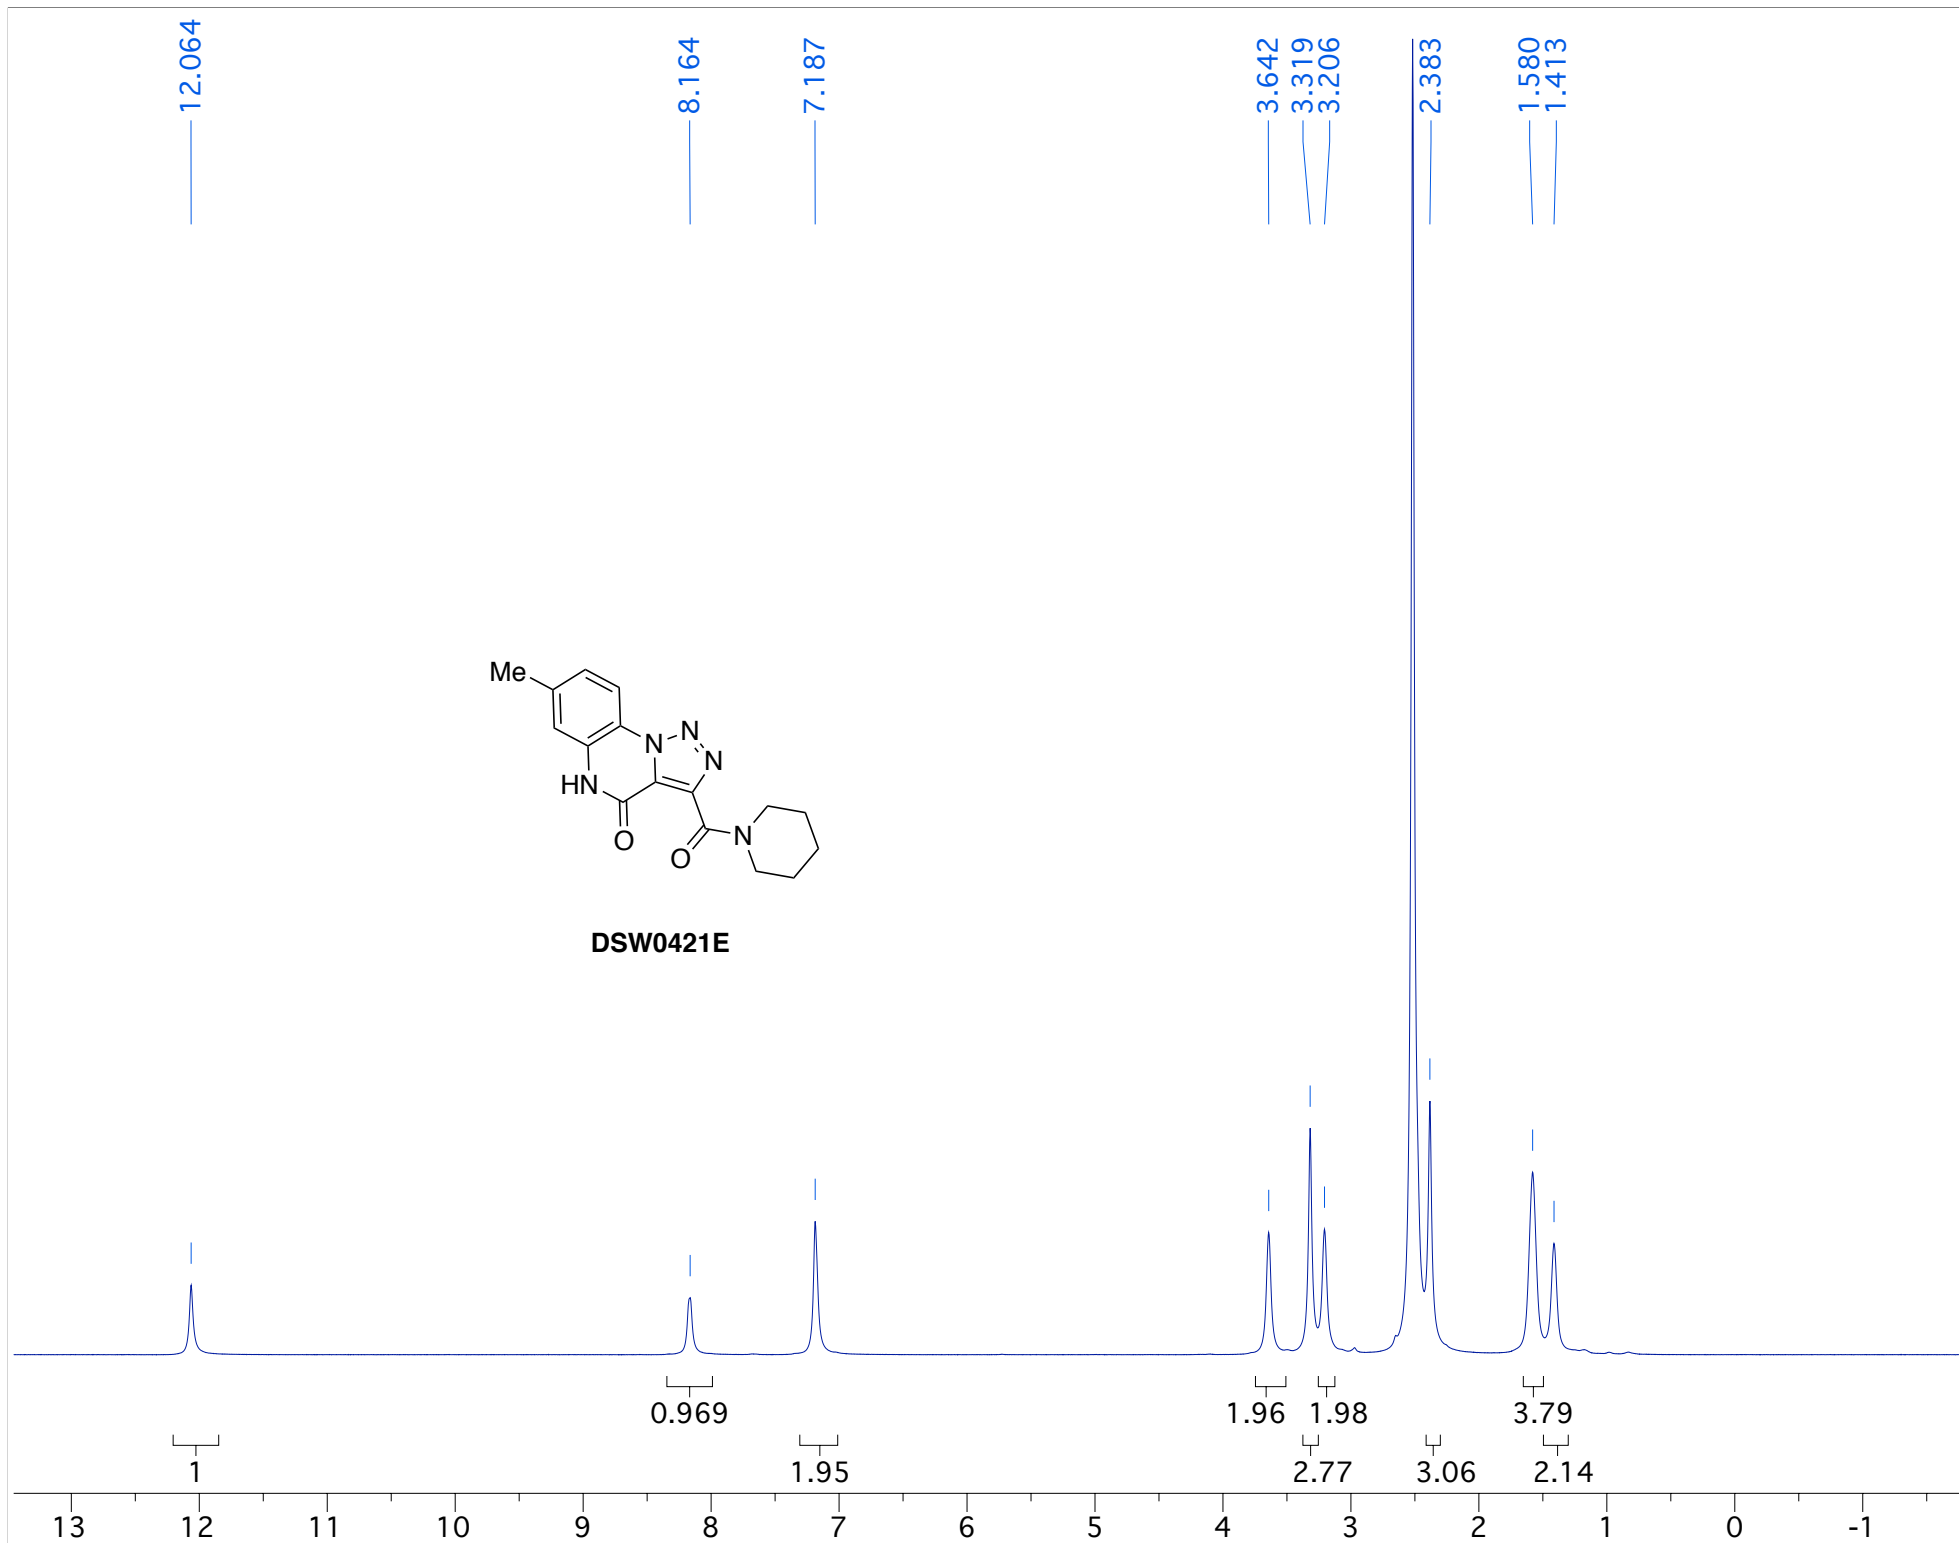



xg-re-DSW-04021E-dmso 1 1 /opt/topspin xguan8

xg-re-DSW-04021E-13C-dmso

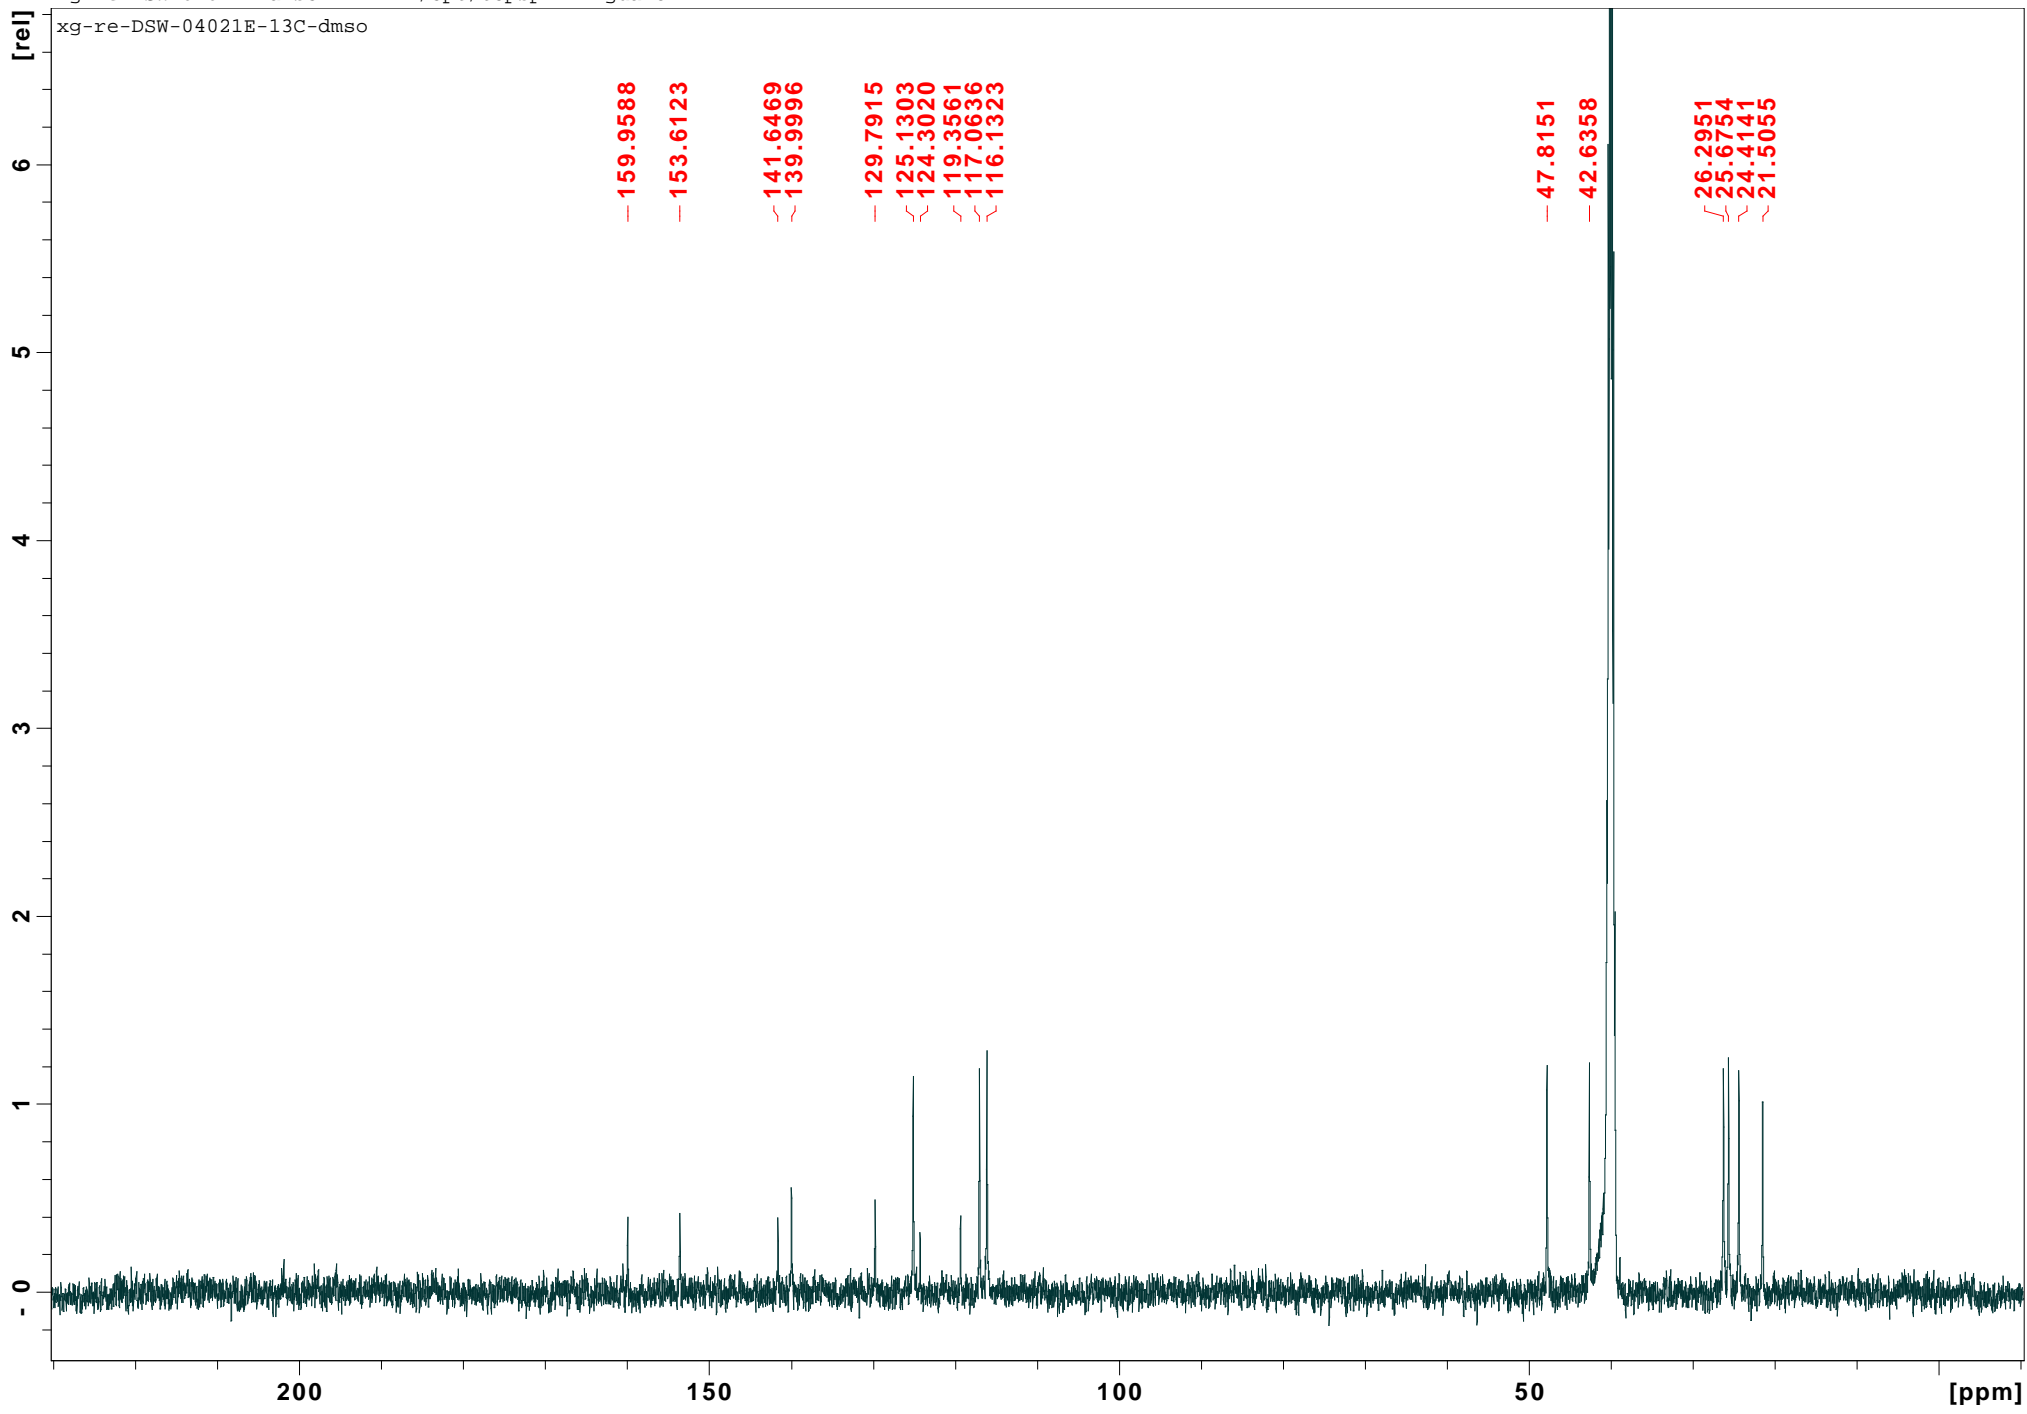

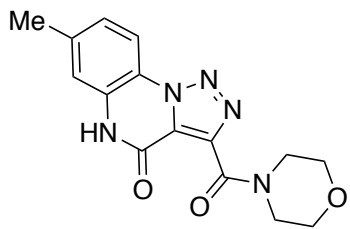

DSW0421F

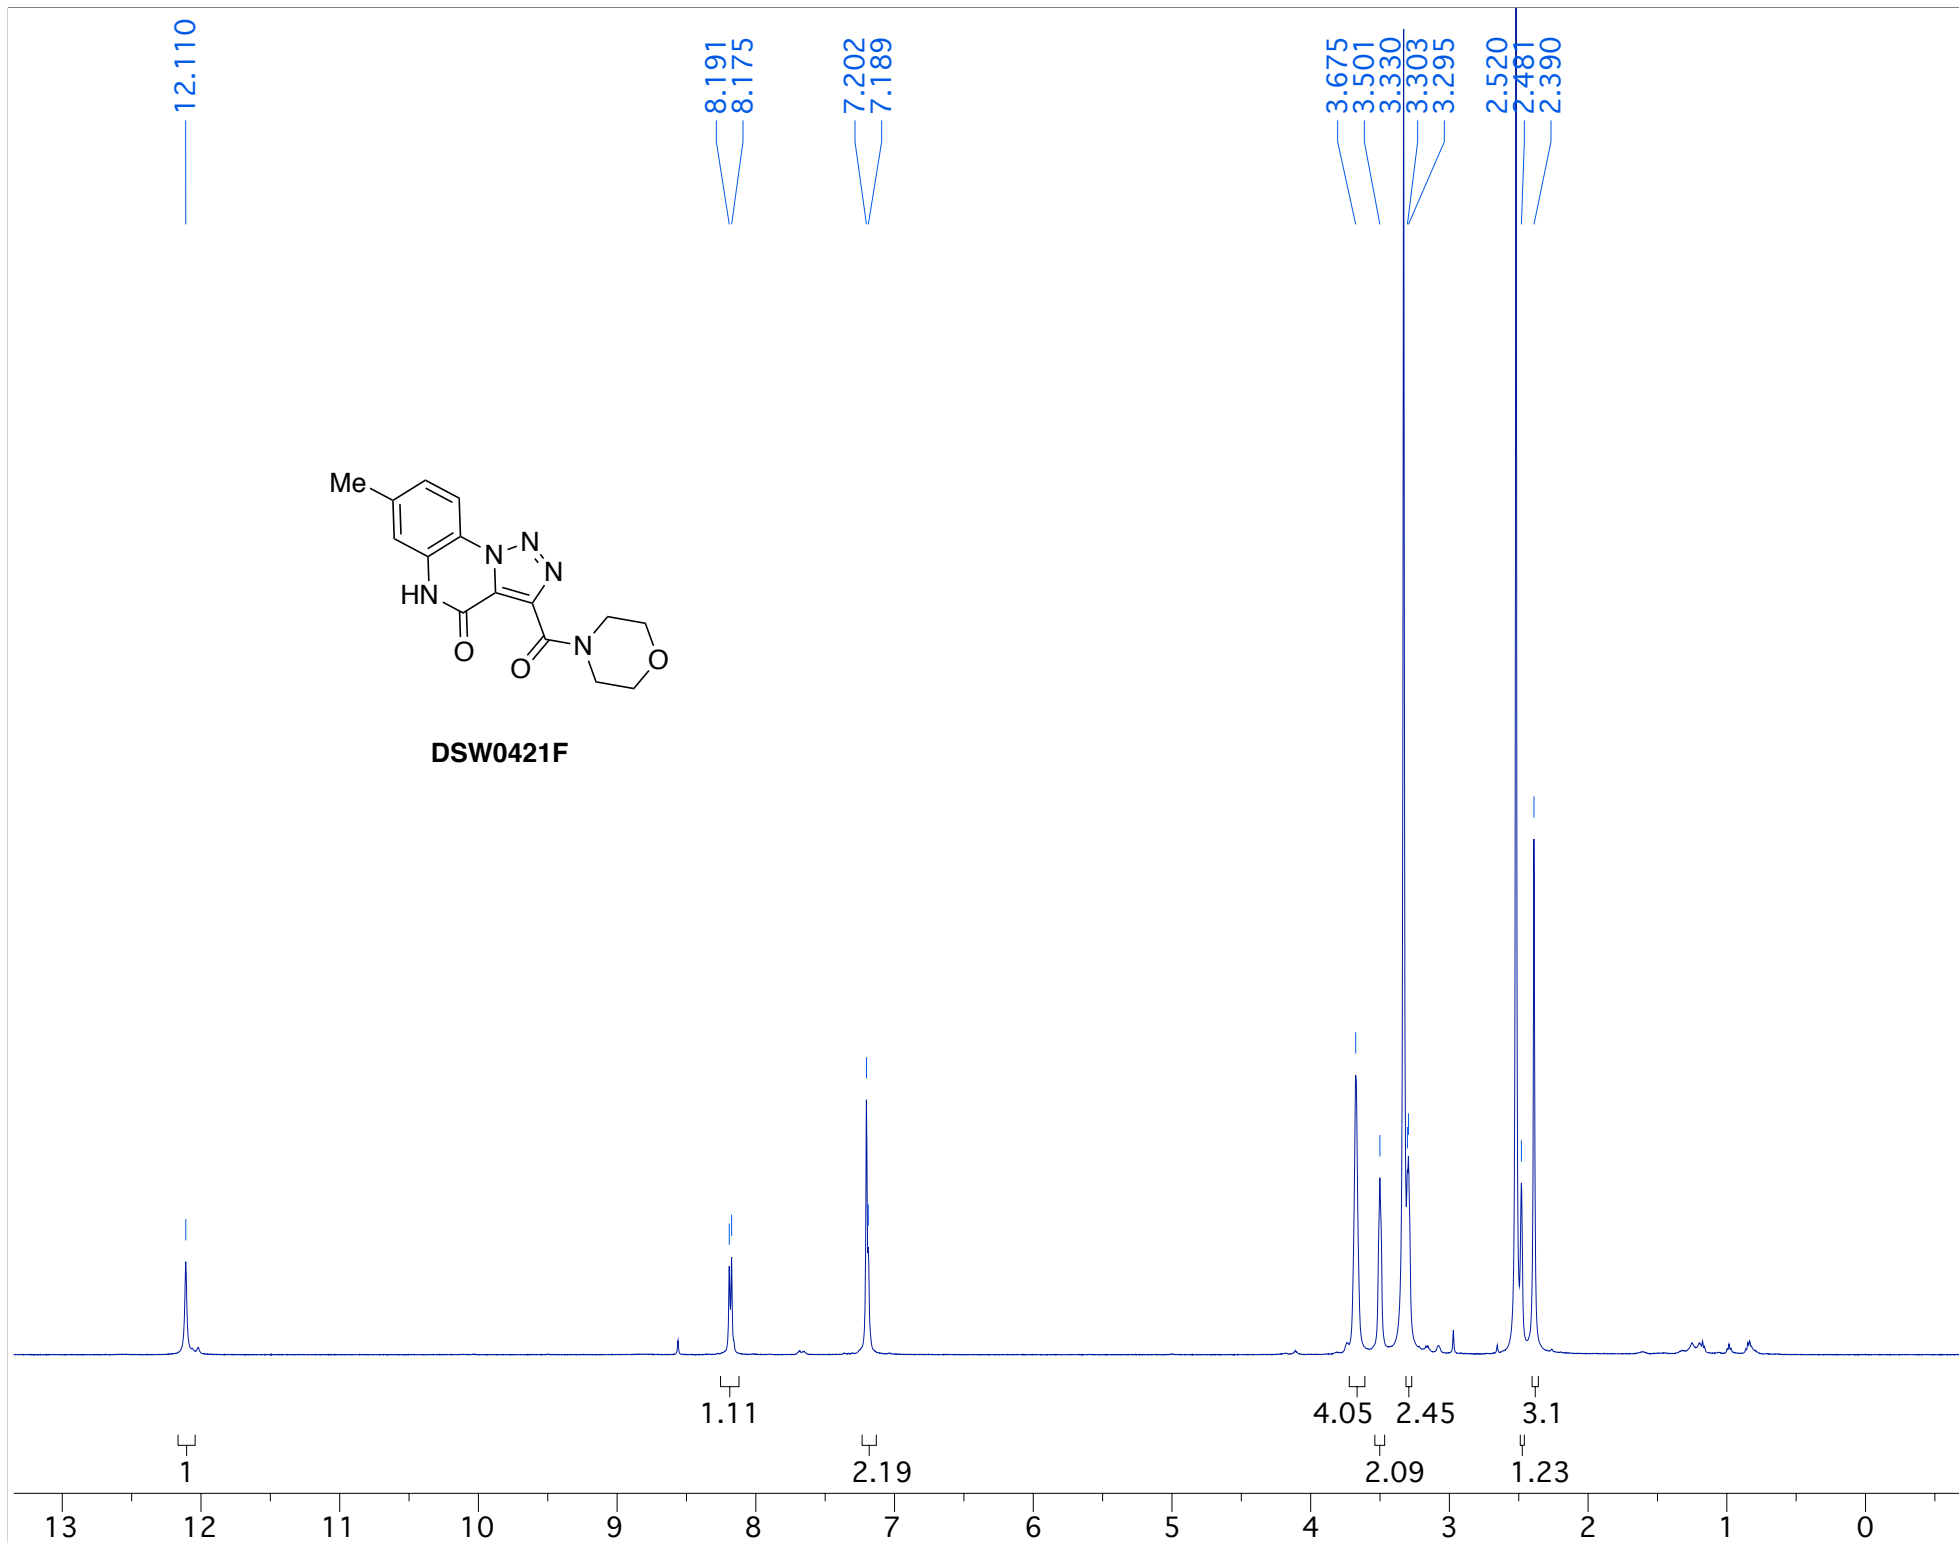

C13 standard parameters, BBO probe.

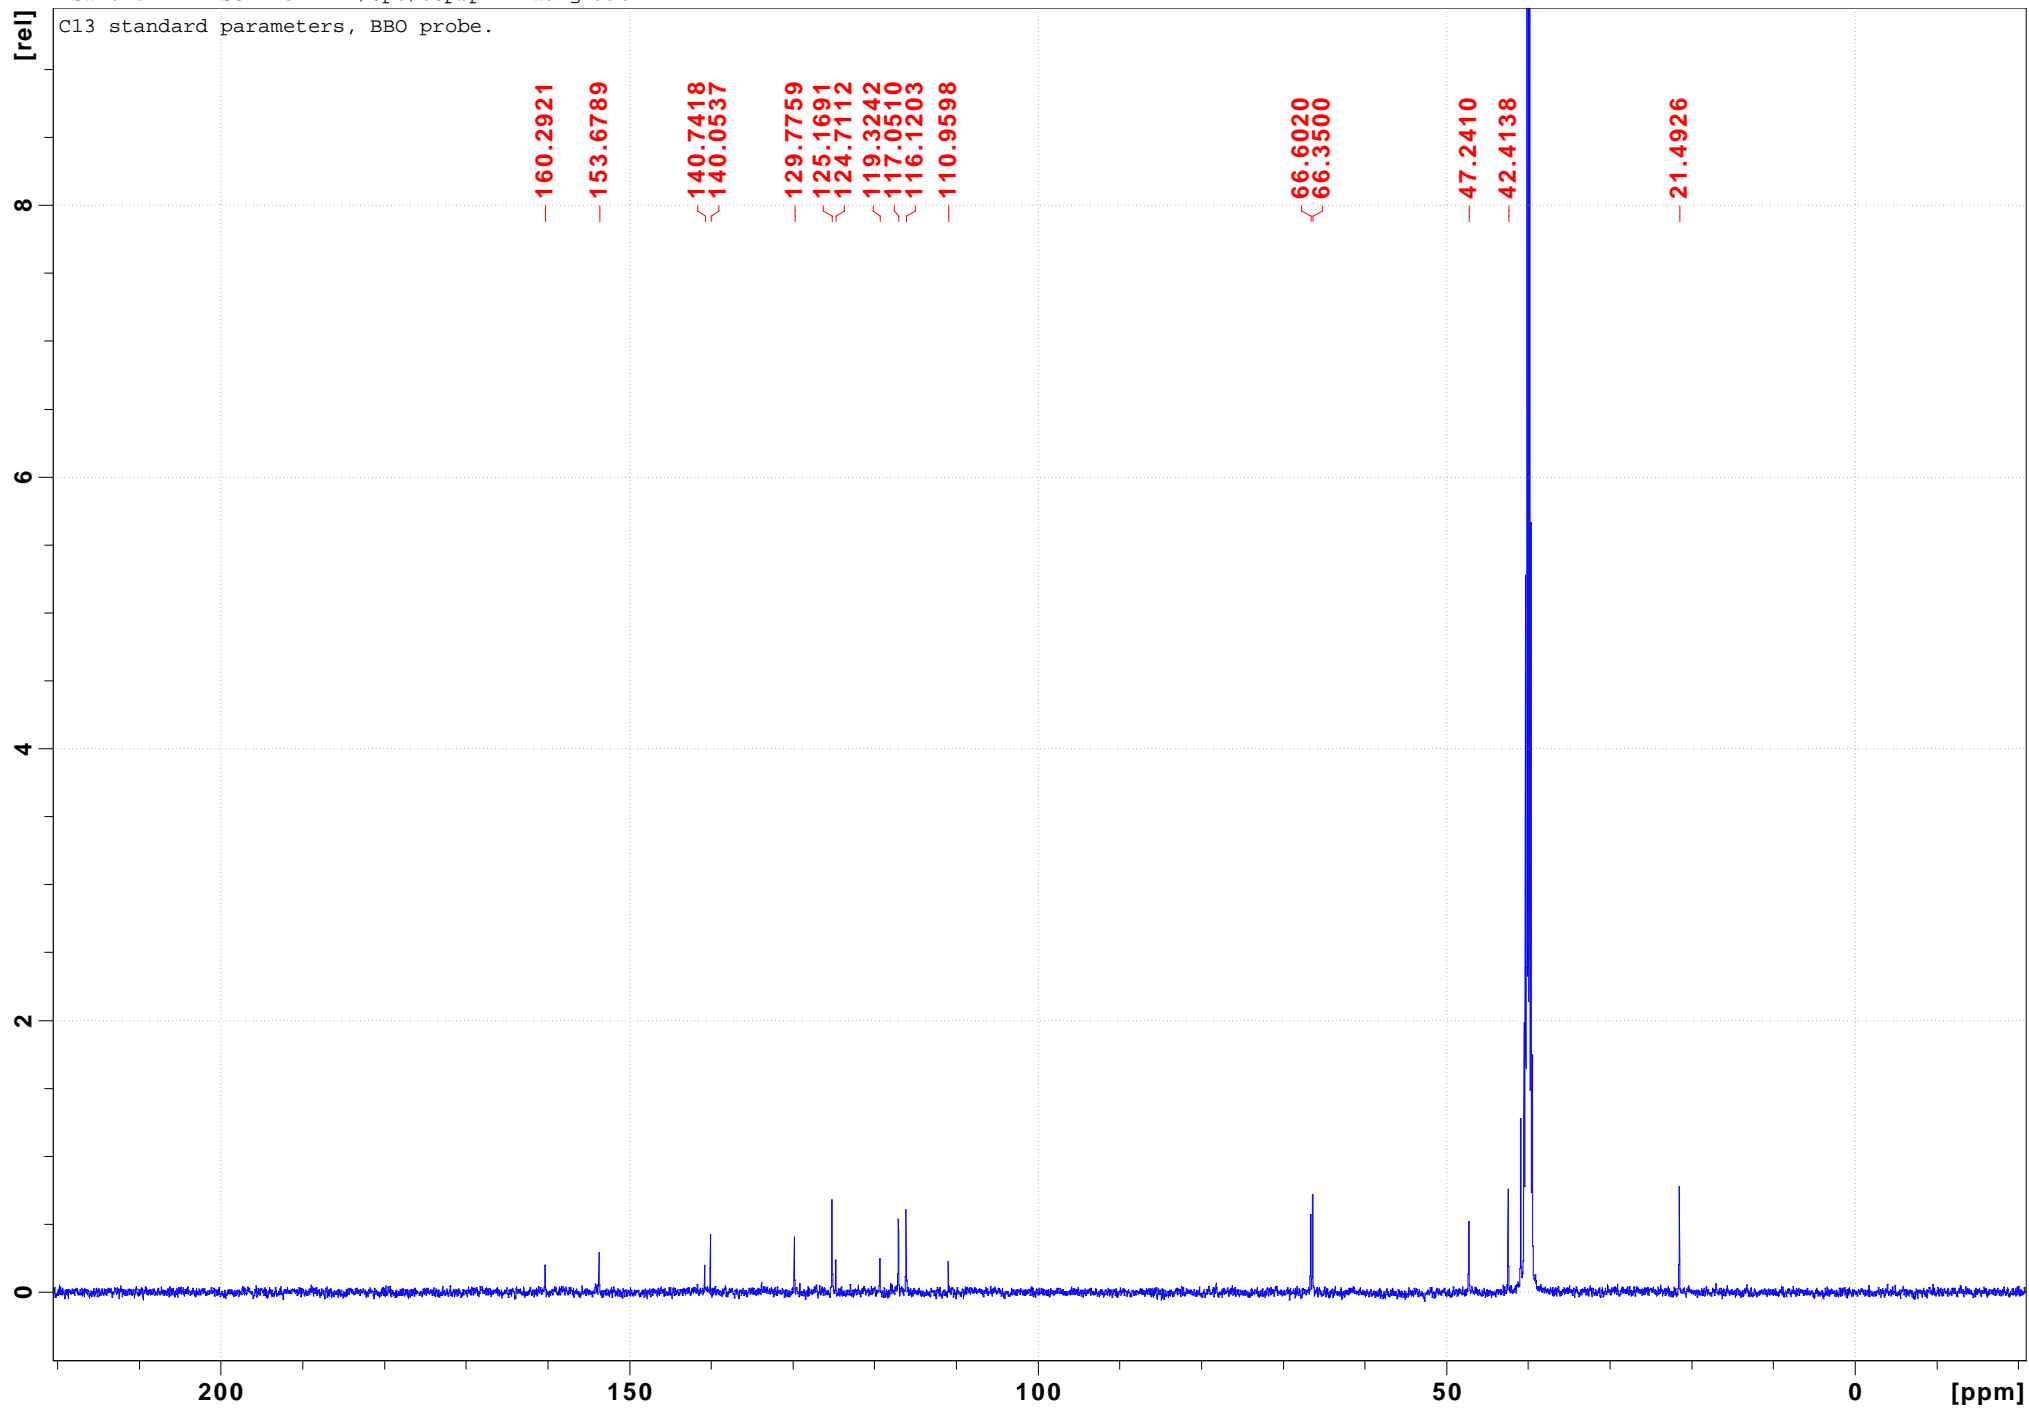

Supplement: 10.1074_M117.810994_jbc.M117.810994-1.pdf [file 10.1074_M117.810994_jbc.M117.810994-1.pdf]
